# Supplementary material for: A Multi-Dataset Meta-Analysis Identifies Core mRNA and lncRNA Networks Associated with Autism Spectrum Disorder
Source: Research Square preprint supplement (doi:10.21203/rs.3.rs-8700783/v1), 2026-02-13
Supplement: Supplementary file 2 [file a6c0223bd632317c75968511.xlsx]

## Sheet: Sheet1
Table S1. Summary of autism spectrum disorder (ASD) transcriptomic datasets included in the meta-analysis. The table lists dataset accession numbers, tissue source, sample size, platform, and study design.
Table S2. Top meta-analysis differentially expressed mRNAs identified using Robust Rank Aggregation (RRA). Genes are ranked by RRA p-value with corresponding mean log fold change across datasets.
Table S3. Hub genes identified from the protein–protein interaction network using CytoHubba based on Maximal Clique Centrality (MCC) scores.
Table S4. Key lncRNA–mRNA regulatory pairs identified based on reproducible correlation analysis across multiple ASD datasets.

## Sheet: Table S1
	Table S1. Summary of autism spectrum disorder (ASD) transcriptomic datasets included in the meta-analysis. The table lists dataset accession numbers, tissue source, sample size, platform, and study design.
	GEO Accession	Tissue Source	Platform (GPL)	ASD-related Samples*	Control Samples	Total Samples	Age Range	Study Design
	GSE6575	Peripheral blood leukocytes	GPL570 (Affymetrix Human Genome U133 Plus 2.0)	ASD	Typically developing	76	1–4 years	Case–control expression profiling
	GSE18123 (GPL570)	Peripheral blood	GPL570 (Affymetrix Human Genome U133 Plus 2.0)	ASD	Typically developing	NA	NA	Case–control expression profiling
	GSE18123 (GPL6244)	Peripheral blood	GPL6244 (Affymetrix Human Gene 1.0 ST Array)	ASD	Typically developing	NA	NA	Case–control expression profiling
	GSE25507	Peripheral blood	GPL570 (Affymetrix Human Genome U133 Plus 2.0)	ASD	Typically developing	NA	NA	Case–control expression profiling
	GSE42133	Peripheral blood leukocytes	GPL570 (Affymetrix Human Genome U133 Plus 2.0)	ASD	Typically developing	133	Infants and toddlers	Case–control expression profiling
	GSE111175	Peripheral blood leukocytes	GPL10558 (Illumina HumanHT-12 V4.0)	ASD, PDD-NOS, AutFeat	TD, Preemie No Delay, LD	141	1–4 years	Case–control and spectrum-based analysis

## Sheet: Table S2
	Table S2. Top meta-analysis differentially expressed mRNAs identified using Robust Rank Aggregation (RRA). Genes are ranked by RRA p-value with corresponding mean log fold change across datasets.
	Gene	RRA_pval	RRA_FDR	n_dataset	mean_logFC	med_logFC	up_count	down_count	Direction
	CCDC34	3.4e-06	0.119011	6	-0.113144	-0.123471	1	5	Down
	HYDIN	1.18e-05	0.14994	6	-0.342104	-0.120491	0	6	Down
	APBB2	1.51e-05	0.14994	6	-0.0956647	-0.0638688	0	6	Down
	HMBS	1.84e-05	0.14994	6	-0.153965	-0.149663	0	6	Down
	CCDC147	2.14e-05	0.14994	5	-0.175039	-0.168055	0	5	Down
	GTSE1	4.73e-05	0.223635	6	-0.103581	-0.0802992	0	6	Down
	SYNPO2	5.06e-05	0.223635	6	-0.109847	-0.0857301	0	6	Down
	PACRG	5.73e-05	0.223635	6	-0.086057	-0.0492163	0	6	Down
	ACSL6	5.75e-05	0.223635	6	-0.0662666	-0.0498355	1	5	Down
	FCRL2	0.000124879	0.43739	6	-0.271541	-0.153343	0	6	Down
	PAX2	0.000188115	0.513618	6	-0.0974768	-0.0987277	1	5	Down
	BACE1	0.000194646	0.513618	6	-0.11779	-0.0896661	0	6	Down
	CD79A	0.000197478	0.513618	6	-0.205165	-0.192192	0	6	Down
	CD37	0.000227771	0.513618	6	-0.208828	-0.102721	0	6	Down
	C15orf57	0.000232927	0.513618	6	-0.148856	-0.100276	0	6	Down
	MT1E	0.000254068	0.513618	6	-0.151743	-0.145056	0	6	Down
	GRIK2	0.000262817	0.513618	6	-0.0799419	-0.0573588	0	6	Down
	GRK4	0.000281069	0.513618	6	-0.130024	-0.0378709	0	6	Down
	IGF2BP3	0.000313901	0.513618	6	-0.225296	-0.273756	1	5	Down
	KCNC4	0.000326087	0.513618	6	-0.0746785	-0.0663574	1	5	Down
	HRK	0.000354112	0.513618	6	-0.137777	-0.173409	2	4	Down
	ABCB9	0.000358938	0.513618	6	-0.143629	-0.116361	1	5	Down
	TLL2	0.000366261	0.513618	6	-0.132153	-0.0759825	0	6	Down
	KLHL5	0.000378242	0.513618	6	-0.0235133	-0.0554552	2	4	Down
	VPREB3	0.000383671	0.513618	6	-0.216883	-0.190596	0	6	Down
	ATP1B4	0.000423055	0.513618	6	-0.202036	-0.0420257	0	6	Down
	GAB1	0.000448448	0.513618	6	-0.0529885	-0.0852378	2	4	Down
	C12orf54	0.000476569	0.513618	6	-0.138884	-0.0981059	1	5	Down
	SCARF1	0.000543075	0.513618	6	-0.0575702	-0.0886358	1	5	Down
	LIMCH1	0.0005437	0.513618	6	-0.103946	-0.0390583	0	6	Down
	PSG1	0.000626273	0.513618	6	-0.170927	-0.0619432	0	6	Down
	RERG	0.000632728	0.513618	6	-0.0910297	-0.0368538	0	6	Down
	IL17RC	0.000642164	0.513618	6	-0.0655133	-0.0842432	1	5	Down
	DCN	0.000681074	0.513618	6	-0.112355	-0.0735512	0	6	Down
	CORIN	0.000690057	0.513618	6	-0.130486	-0.0379744	1	5	Down
	HDAC9	0.000692768	0.513618	6	-0.126252	-0.0737894	1	5	Down
	ELFN2	0.000699352	0.513618	6	-0.059341	-0.0126413	2	4	Down
	A1CF	0.000709115	0.513618	6	-0.0779073	-0.0722163	0	6	Down
	GNAO1	0.000728078	0.513618	6	-0.0507565	0.0442733	4	2	Down
	HM13	0.000751824	0.513618	6	-0.105471	-0.080784	0	6	Down
	FREM3	0.000752977	0.513618	6	-0.209054	-0.0466323	0	6	Down
	ST6GALNAC4	0.00076578	0.513618	6	-0.117685	-0.116035	1	5	Down
	TCL1A	0.00077456	0.513618	6	-0.175356	-0.155373	0	6	Down
	IL17A	0.000807936	0.513618	6	-0.431782	-0.0899343	2	4	Down
	MT1G	0.000871967	0.513618	6	-0.128361	-0.143418	0	6	Down
	DACH2	0.000879158	0.513618	6	-0.13575	-0.0362635	0	6	Down
	KPNA2	0.000880303	0.513618	6	-0.0103617	-0.00612773	3	3	Down
	EGR1	0.000896313	0.513618	6	-0.147668	-0.0237879	2	4	Down
	TIMD4	0.000903708	0.513618	6	-0.104346	-0.0995749	0	6	Down
	BCAR1	0.000934376	0.513618	6	-0.0628644	-0.0714854	2	4	Down
	SLCO5A1	0.000939867	0.513618	6	-0.229237	-0.0557294	0	6	Down
	DSCAM	0.000948786	0.513618	6	-0.298111	-0.0699056	2	4	Down
	ALS2CR11	0.000950599	0.513618	6	-0.34196	-0.0830649	1	5	Down
	YIF1B	0.000953695	0.513618	6	-0.131571	-0.0982304	1	5	Down
	MS4A1	0.000961528	0.513618	6	-0.134863	-0.174814	2	4	Down
	SLC25A27	0.000977486	0.513618	6	-0.226737	-0.0663971	0	6	Down
	SPRYD4	0.000998407	0.513618	6	-0.120488	-0.12567	0	6	Down
	OTOF	0.00100037	0.513618	6	-0.114128	-0.129971	0	6	Down
	POLD1	0.0010011	0.513618	6	-0.0710695	-0.0704336	0	6	Down
	SORBS1	0.00100617	0.513618	6	-0.092224	-0.0773172	1	5	Down
	LARP4B	0.00101554	0.513618	6	-0.0817535	-0.0375089	3	3	Down
	RGS5	0.00102081	0.513618	6	-0.11125	-0.071944	0	6	Down
	KCTD16	0.00102776	0.513618	6	-0.096172	-0.107027	2	4	Down
	C1QC	0.00102776	0.513618	6	-0.126138	-0.0373703	2	4	Down
	FLJ41327	0.00102776	0.513618	3	-0.0843028	-0.0168359	1	2	Down
	LOC100132510	0.00102776	0.513618	2	-0.164031	-0.164031	0	2	Down
	DLC1	0.00102954	0.513618	6	-0.0917759	-0.0864191	2	4	Down
	RNF128	0.00106949	0.513618	6	-0.168172	-0.0311209	0	6	Down
	PARVA	0.00108684	0.513618	6	-0.0799694	-0.0736543	1	5	Down
	C11orf80	0.00109444	0.513618	6	-0.0929452	-0.0800114	0	6	Down
	SLCO1A2	0.00110002	0.513618	6	-0.13675	-0.062601	2	4	Down
	DNAH14	0.00112954	0.513618	6	-0.256421	-0.0531852	0	6	Down
	PRR19	0.00113393	0.513618	6	-0.0770125	-0.0649635	0	6	Down
	FAT3	0.0011458	0.513618	6	-0.179276	-0.0590512	0	6	Down
	EPHA5	0.00118142	0.513618	6	-0.284726	-0.0846981	0	6	Down
	SIGLEC1	0.00119661	0.513618	6	-0.138615	-0.0867469	0	6	Down
	CCNB2	0.00121367	0.513618	6	-0.19799	-0.157329	0	6	Down
	GABRA4	0.00122509	0.513618	6	-0.129771	-0.0440177	0	6	Down
	ANLN	0.00122747	0.513618	6	-0.108461	-0.0667472	0	6	Down
	BEST3	0.0012318	0.513618	6	-0.188405	-0.0571536	0	6	Down
	EFHB	0.00125806	0.518391	6	-0.119488	-0.0840876	1	5	Down
	IL27	0.00128216	0.518391	6	-0.075968	-0.0684508	0	6	Down
	ITSN1	0.00128765	0.518391	6	-0.0697312	-0.038794	1	5	Down
	DSCR8	0.00132312	0.520699	6	-0.0818512	-0.0351901	0	6	Down
	DEFB108B	0.00134915	0.522819	6	-0.188663	-0.0305277	0	6	Down
	LAMC2	0.00135836	0.522819	6	-0.252934	-0.0918917	1	5	Down
	GPR84	0.00146058	0.550555	6	-0.113246	-0.119831	0	6	Down
	OTX2	0.00146186	0.550555	6	-0.325746	-0.0542219	1	5	Down
	TMEM160	0.00149746	0.554565	6	-0.0677943	-0.083088	1	5	Down
	NCAM2	0.00152481	0.554565	6	-0.133176	-0.0270665	0	6	Down
	DPPA4	0.00155251	0.554565	6	-0.101479	-0.0774556	1	5	Down
	ZNF214	0.0015683	0.554565	6	-0.0635517	-0.0521413	1	5	Down
	HSD17B6	0.00157307	0.554565	6	-0.208718	-0.0402612	1	5	Down
	SPTLC1	0.0016228	0.554565	6	-0.0142135	-0.131321	2	4	Down
	ARHGAP27	0.00166298	0.554565	6	-0.0605838	-0.0683702	3	3	Down
	ULBP3	0.00166816	0.554565	6	-0.106633	-0.0365205	0	6	Down
	UQCC	0.00167549	0.554565	2	-0.136081	-0.136081	0	2	Down
	DNMT3B	0.0016791	0.554565	6	-0.0652553	-0.0602614	1	5	Down
	ALS2CL	0.00170435	0.554565	6	-0.0489496	-0.0528547	1	5	Down
	UBE2G2	0.00172476	0.554565	6	-0.0945642	-0.0848887	1	5	Down
	SEMA5A	0.00172818	0.554565	6	-0.168524	-0.0649401	0	6	Down
	PARP14	0.00174714	0.554565	6	-0.140803	-0.176546	1	5	Down
	ISY1	0.00176996	0.554565	5	-0.12181	-0.131548	1	4	Down
	LSM4	0.00183333	0.554565	6	-0.0521783	-0.06838	1	5	Down
	RHOQ	0.00183384	0.554565	6	-0.0506669	-0.0908647	2	4	Down
	PTPN14	0.00184563	0.554565	6	-0.124174	-0.064141	0	6	Down
	CLCN2	0.00185537	0.554565	6	-0.0461178	0.0227075	4	2	Down
	CRISP2	0.00185676	0.554565	6	-0.113545	-0.0913332	1	5	Down
	HRSP12	0.00189638	0.554565	5	-0.0707755	-0.100746	1	4	Down
	C21orf58	0.00189638	0.554565	6	-0.0982837	-0.0873986	1	5	Down
	LSAMP	0.00190241	0.554565	6	-0.066325	-0.0442047	1	5	Down
	CHAT	0.00192067	0.554565	6	-0.0708525	-0.0424275	2	4	Down
	BOLA2	0.00192516	0.554565	5	-0.061013	-0.127506	1	4	Down
	PTGR1	0.00194763	0.554565	6	-0.0772753	-0.053238	0	6	Down
	ASAP3	0.00197239	0.554565	6	-0.0730702	-0.0746439	2	4	Down
	ADAM6	0.00199649	0.554565	6	-0.0438823	-0.041607	0	6	Down
	HTRA2	0.00200691	0.554565	6	-0.0782907	-0.0846322	0	6	Down
	MT2A	0.00202788	0.554565	6	-0.152432	-0.131021	0	6	Down
	LSM12	0.00203584	0.554565	6	-0.1019	-0.118419	1	5	Down
	GSTCD	0.00205538	0.554565	6	-0.0842156	-0.0394656	1	5	Down
	PSENEN	0.00205538	0.554565	6	-0.0883276	-0.0517856	2	4	Down
	LOC653324	0.00205538	0.554565	2	-0.170237	-0.170237	0	2	Down
	LOC644563	0.00205538	0.554565	2	-0.143527	-0.143527	0	2	Down
	SLC39A12	0.00205834	0.554565	6	-0.11915	-0.0379944	0	6	Down
	CLRN1	0.00209594	0.557818	6	-0.238411	-0.0533035	0	6	Down
	NEO1	0.00215341	0.557818	6	-0.0770846	-0.053696	0	6	Down
	CADM1	0.00216311	0.557818	6	-0.104164	-0.0958133	0	6	Down
	CYB5R2	0.00219666	0.557818	6	-0.0867524	-0.040643	0	6	Down
	PNOC	0.00222638	0.557818	6	-0.16432	-0.117303	0	6	Down
	VN1R2	0.00223635	0.557818	6	-0.0832513	-0.0613577	0	6	Down
	SLC10A4	0.00224494	0.557818	6	-0.122291	-0.0322984	0	6	Down
	BCL2L14	0.00225007	0.557818	6	-0.0920813	-0.0678775	1	5	Down
	CNGB1	0.00228078	0.557818	6	-0.072553	-0.0538513	2	4	Down
	SALL1	0.00228399	0.557818	6	-0.20579	-0.066787	0	6	Down
	GRIA4	0.00228769	0.557818	6	-0.0757782	-0.0590882	2	4	Down
	F7	0.00229316	0.557818	6	-0.0338413	0.0136702	3	3	Down
	MYOT	0.00229555	0.557818	6	-0.0842542	-0.0441565	0	6	Down
	RERGL	0.00229993	0.557818	6	-0.129183	-0.0357121	0	6	Down
	PPHLN1	0.00232598	0.557818	6	-0.0099971	-0.100916	2	4	Down
	REEP1	0.00233128	0.557818	6	-0.14086	-0.111764	1	5	Down
	TNFAIP8L3	0.00234116	0.557818	6	-0.108608	-0.0394381	0	6	Down
	RHOXF1	0.00236351	0.559337	6	-0.0602957	-0.0467283	0	6	Down
	INTU	0.00239206	0.562295	6	-0.109224	-0.0554513	0	6	Down
	DEPDC1	0.00245466	0.568862	6	-0.0906478	-0.0805842	0	6	Down
	EFS	0.00245822	0.568862	6	-0.116556	-0.0713728	1	5	Down
	TUBG1	0.00246872	0.568862	6	-0.0706598	-0.0755777	1	5	Down
	CAMK2D	0.00254211	0.571647	6	-0.153382	-0.102546	0	6	Down
	RAB3IP	0.00258831	0.571647	6	-0.195601	-0.0945047	2	4	Down
	SLC3A1	0.0025888	0.571647	6	-0.047234	-0.0383472	0	6	Down
	FAM13C	0.00263022	0.571647	4	-0.324858	-0.179231	0	4	Down
	C11orf65	0.00263148	0.571647	6	-0.358488	-0.0423102	0	6	Down
	IGDCC4	0.00264743	0.571647	6	-0.139095	-0.0248615	0	6	Down
	AKR1D1	0.00265401	0.571647	6	-0.0901663	-0.0711167	0	6	Down
	RAD51	0.00266522	0.571647	6	-0.116105	-0.0523065	1	5	Down
	SNTG1	0.00267218	0.571647	6	-0.147816	-0.0612836	0	6	Down
	TOX3	0.00268427	0.571647	6	-0.0626431	-0.0403214	2	4	Down
	OLFM3	0.00268434	0.571647	6	-0.304852	-0.0356216	1	5	Down
	ITGA1	0.0026989	0.571647	5	-0.1074	-0.0825625	0	5	Down
	ANO5	0.00271073	0.571647	6	-0.0948231	-0.109077	1	5	Down
	FKBP11	0.00272394	0.571647	6	-0.119901	-0.0912388	0	6	Down
	RNASE1	0.00272563	0.571647	6	-0.0566358	-0.0530764	0	6	Down
	CYB5A	0.00274853	0.571898	6	-0.326546	-0.0396388	2	4	Down
	UMODL1	0.00275948	0.571898	6	-0.119126	-0.0388477	0	6	Down
	DGKH	0.00279481	0.575812	6	-0.173095	-0.0904149	2	4	Down
	SCUBE2	0.00284216	0.577099	6	-0.063781	-0.0296773	0	6	Down
	GALK1	0.00284724	0.577099	6	-0.11444	-0.092943	2	4	Down
	JPH1	0.00285048	0.577099	6	-0.0684106	-0.0728173	1	5	Down
	ADRA1A	0.00287987	0.579698	6	-0.0870418	-0.0554926	1	5	Down
	FOXR1	0.00295021	0.582325	6	-0.192992	-0.0541583	0	6	Down
	MS4A6E	0.00301557	0.582325	6	-0.0311277	-0.0356902	0	6	Down
	DUSP27	0.00302841	0.582325	6	-0.0476515	-0.0233358	0	6	Down
	OR2F1	0.00305566	0.582325	6	-0.0896315	-0.0322374	0	6	Down
	PKD2L2	0.0030561	0.582325	6	-0.0883026	-0.0722017	0	6	Down
	EFEMP2	0.00308285	0.582325	6	-0.0828783	-0.0668492	2	4	Down
	DTX4	0.00308285	0.582325	6	-0.109302	-0.119288	1	5	Down
	LOC101928748	0.00308285	0.582325	3	-0.144486	-0.0337567	1	2	Down
	GTF3C6	0.00308285	0.582325	6	-0.0439335	-0.0263631	2	4	Down
	LOC389286	0.00308285	0.582325	2	-0.193748	-0.193748	0	2	Down
	ZNF391	0.00309438	0.582325	6	-0.100834	-0.0258907	2	4	Down
	C6orf141	0.00312702	0.582325	6	-0.137815	-0.0497873	0	6	Down
	COL8A1	0.00312975	0.582325	6	-0.0851188	-0.0492563	1	5	Down
	POPDC3	0.00314231	0.582325	6	-0.0898608	-0.0346321	0	6	Down
	GPX8	0.00318315	0.58401	6	-0.126659	-0.0806275	0	6	Down
	KLF1	0.00319036	0.58401	6	-0.211601	-0.135971	1	5	Down
	TK1	0.00320143	0.58401	6	-0.112223	-0.139603	1	5	Down
	CPNE4	0.00322666	0.585564	6	-0.163405	-0.0376191	0	6	Down
	PCLO	0.00327722	0.590677	6	-0.0876829	-0.0485802	1	5	Down
	CLIC5	0.00328857	0.590677	6	-0.128869	-0.113955	1	5	Down
	CLCN5	0.00330893	0.591303	6	-0.0553071	-0.05766	0	6	Down
	RORA	0.00335153	0.594493	6	-0.131906	-0.110137	1	5	Down
	IL26	0.00336073	0.594493	6	-0.130117	-0.0387691	0	6	Down
	SHC4	0.00338627	0.596001	6	-0.201006	-0.0370376	1	5	Down
	KCNMA1	0.00342599	0.599977	6	-0.116056	-0.0753405	1	5	Down
	PGK2	0.00345609	0.602236	6	-0.0573913	-0.0344222	0	6	Down
	GREM1	0.00353273	0.603043	6	-0.132553	-0.0734636	0	6	Down
	SH2B2	0.00353535	0.603043	6	-0.0872383	-0.133431	1	5	Down
	SULT1C2	0.00354739	0.603043	6	-0.156703	-0.0654509	0	6	Down
	TSPAN4	0.00355502	0.603043	6	-0.065108	-0.0715426	2	4	Down
	ODF3B	0.0036254	0.603043	6	-0.145273	-0.152743	2	4	Down
	ZDHHC12	0.00368316	0.603043	6	-0.101345	-0.100923	1	5	Down
	PTGES2	0.00369026	0.603043	6	-0.0440552	-0.045566	0	6	Down
	TUBB2B	0.00370329	0.603043	6	-0.0864863	-0.0248222	0	6	Down
	PPP2R2C	0.00372538	0.603043	6	-0.557458	-0.0245448	3	3	Down
	TNFSF15	0.00374005	0.603043	6	-0.0754795	-0.0934313	1	5	Down
	TUBB6	0.00374319	0.603043	6	-0.171835	-0.188567	1	5	Down
	OR7E37P	0.00375798	0.603043	5	-0.0853774	-0.0840205	1	4	Down
	MCC	0.00376018	0.603043	6	-0.0524131	-0.0456978	0	6	Down
	PTGFRN	0.00382567	0.603043	6	-0.107232	-0.0719724	1	5	Down
	NPAS3	0.00384811	0.603043	6	-0.12937	-0.0853986	1	5	Down
	HSFY1	0.00385776	0.603043	5	-0.0607422	-0.0404906	0	5	Down
	KIAA1432	0.00385845	0.603043	5	-0.00524523	-0.0610222	1	4	Down
	LGALS3	0.00389918	0.603043	6	-0.0935424	-0.0823113	0	6	Down
	EYS	0.00390956	0.603043	6	-0.255324	-0.0473876	1	5	Down
	ASB15	0.00392381	0.603043	6	-0.0783113	-0.0622341	0	6	Down
	CGN	0.00393239	0.603043	6	-0.0824237	-0.0313131	1	5	Down
	B4GALNT1	0.00397209	0.603043	6	-0.0848988	-0.0297652	2	4	Down
	SSX4	0.0039764	0.603043	5	-0.0814252	-0.0421472	0	5	Down
	AP2A1	0.00398678	0.603043	6	-0.0197236	-0.069256	2	4	Down
	CHN1	0.00399507	0.603043	6	-0.0764011	-0.0569684	0	6	Down
	CDC25A	0.00399739	0.603043	6	-0.0719689	-0.0687673	0	6	Down
	KIF9	0.00401479	0.603043	6	-0.0552021	-0.0399647	0	6	Down
	HMGCLL1	0.0040276	0.603043	6	-0.0730032	-0.03195	0	6	Down
	ANKRD7	0.0040276	0.603043	6	-0.0738688	-0.0270513	0	6	Down
	CA12	0.00404947	0.603043	6	-0.0435604	-0.0416108	2	4	Down
	CDH19	0.00405147	0.603043	6	-0.118248	-0.118408	0	6	Down
	LOC100131860	0.00411017	0.603043	4	-0.0333107	-0.0759991	2	2	Down
	IGLV4-3	0.00411017	0.603043	3	-0.251479	-0.151066	1	2	Down
	TESK2	0.00411017	0.603043	6	-0.0421126	-0.0143364	3	3	Down
	LOC728602	0.00411017	0.603043	2	-0.104265	-0.104265	1	1	Down
	INTS6	0.00411498	0.603043	6	-0.0644927	-0.0523442	1	5	Down
	GPR50	0.00414604	0.605062	6	-0.119031	-0.0922884	0	6	Down
	ASPHD2	0.00416475	0.605271	6	-0.0765697	-0.0748346	0	6	Down
	ROR2	0.00419602	0.607295	6	-0.062027	-0.0464049	0	6	Down
	SULF1	0.00427127	0.615643	6	-0.0845323	-0.060483	2	4	Down
	MCM2	0.00434389	0.616122	6	-0.0384401	-0.0923181	1	5	Down
	CD72	0.00436159	0.616122	6	-0.125232	-0.129838	1	5	Down
	SLC30A6	0.00436823	0.616122	6	-0.0650742	-0.0731508	1	5	Down
	RAB43	0.00443656	0.616122	6	-0.0941155	-0.109984	1	5	Down
	SLC27A6	0.00444241	0.616122	6	-0.127235	-0.102395	1	5	Down
	TARBP2	0.00446338	0.616122	6	-0.0513123	-0.0645373	1	5	Down
	KCND3	0.00446538	0.616122	6	-0.0898973	-0.0548464	1	5	Down
	C11orf45	0.004469	0.616122	6	-0.109977	-0.0577627	1	5	Down
	CCNE2	0.00450421	0.616122	6	-0.247083	-0.0871202	0	6	Down
	PRICKLE1	0.00452473	0.616122	6	-0.0884348	-0.0749558	0	6	Down
	RAD51AP1	0.00452473	0.616122	6	-0.0819905	-0.0571479	0	6	Down
	MVD	0.00453809	0.616122	6	-0.0872179	-0.0588906	1	5	Down
	ERCC2	0.00454858	0.616122	6	-0.0698852	-0.0574016	1	5	Down
	GBA3	0.00455641	0.616122	6	-0.0810657	-0.054966	1	5	Down
	ALAS2	0.00455641	0.616122	6	-0.314335	-0.354987	1	5	Down
	SNX7	0.00457364	0.616122	6	-0.0625209	-0.0548924	1	5	Down
	TPSG1	0.00459575	0.616728	6	-0.101892	-0.0643478	1	5	Down
	ELAVL4	0.00462338	0.617057	6	-0.0847389	-0.0913646	1	5	Down
	PSKH2	0.00465133	0.617057	6	-0.0673012	-0.0218396	3	3	Down
	C9orf152	0.00465209	0.617057	6	-0.0285332	-0.0250181	0	6	Down
	ATG10	0.00467867	0.617057	6	-0.102532	-0.150739	2	4	Down
	DPM3	0.00468629	0.617057	6	-0.0687347	-0.0900532	1	5	Down
	HTRA4	0.00471821	0.618756	6	-0.0802299	-0.0507828	0	6	Down
	ABL2	0.00473904	0.618756	6	-0.0477551	-0.030828	1	5	Down
	NUDT10	0.00478651	0.618756	6	-0.0540625	-0.0394543	2	4	Down
	RPAIN	0.00478752	0.618756	6	-0.0765118	-0.0732344	1	5	Down
	SIPA1L3	0.00478752	0.618756	6	-0.0793871	-0.110937	1	5	Down
	CTNNB1	0.00482513	0.61934	6	-0.038139	-0.0692853	2	4	Down
	KCTD17	0.00484358	0.61934	6	-0.10995	-0.0490564	2	4	Down
	HMP19	0.00485915	0.61934	6	-0.12612	-0.0728785	2	4	Down
	RNF213	0.00488954	0.61934	6	-0.0645266	-0.142246	2	4	Down
	PARP11	0.00492347	0.61934	6	-0.0370218	-0.0936604	1	5	Down
	FGB	0.00493232	0.61934	6	-0.069112	-0.0383687	0	6	Down
	BCL7B	0.00501292	0.61934	6	-0.0562823	-0.0504767	0	6	Down
	CDC25C	0.00505349	0.61934	6	-0.0976539	-0.080431	1	5	Down
	MOB3B	0.00505398	0.61934	4	-0.221768	-0.239299	0	4	Down
	TREML3P	0.00507624	0.61934	4	-0.187262	-0.255068	1	3	Down
	MPV17L	0.00508675	0.61934	6	-0.0497941	-0.0460297	2	4	Down
	ACY3	0.00513735	0.61934	6	-0.0867181	-0.0724965	1	5	Down
	TRANK1	0.00513735	0.61934	4	-0.00197481	0.0546728	2	2	Down
	CDO1	0.00513735	0.61934	6	-0.0899073	-0.0319967	2	4	Down
	AQP1///AQP1	0.00513735	0.61934	1	-0.242231	-0.242231	0	1	Down
	LOC391670	0.00513735	0.61934	2	-0.142719	-0.142719	0	2	Down
	CCDC5	0.00513735	0.61934	2	-0.13236	-0.13236	0	2	Down
	CD79B	0.00514569	0.61934	6	-0.131003	-0.16493	1	5	Down
	BCL11A	0.00522285	0.623721	6	-0.136616	-0.122626	1	5	Down
	IRF4	0.00523517	0.623721	6	-0.109784	-0.0779617	0	6	Down
	PAFAH1B3	0.00523928	0.623721	6	-0.0774129	-0.048742	1	5	Down
	HTR3A	0.00526794	0.623721	6	-0.109319	-0.0763629	1	5	Down
	CEACAM1	0.00531602	0.623721	6	-0.0700878	-0.131238	2	4	Down
	EXOSC5	0.00531694	0.623721	6	-0.0587843	-0.0406993	0	6	Down
	BRDT	0.0053287	0.623721	6	-0.0518235	-0.0373277	0	6	Down
	BMP2K	0.00534237	0.623721	6	-0.0169764	-0.0921341	1	5	Down
	SUOX	0.00542603	0.631385	6	-0.0734685	-0.0763876	1	5	Down
	WBP11P1	0.00546334	0.633313	3	-0.112505	-0.0744055	0	3	Down
	FARP2	0.00548815	0.633313	6	-0.0517705	-0.0600655	1	5	Down
	IL31RA	0.00549795	0.633313	6	-0.0755662	-0.0719248	1	5	Down
	NCDN	0.00552779	0.633313	6	-0.0723739	-0.0649733	1	5	Down
	FAM129C	0.00554061	0.633313	6	-0.122394	-0.116118	1	5	Down
	GPC5	0.00557168	0.633313	6	-0.0697633	-0.058024	0	6	Down
	CBX2	0.00557555	0.633313	6	-0.0546018	-0.0832454	2	4	Down
	LIN28B	0.00560076	0.633313	6	-0.233997	-0.0450264	1	5	Down
	CTXN3	0.0056267	0.633313	6	-0.0775075	-0.0375739	1	5	Down
	RBM43	0.00563925	0.633313	6	-0.0591092	-0.066624	0	6	Down
	MYLK2	0.00567012	0.633313	6	-0.0775868	-0.0329166	2	4	Down
	CAMK2B	0.00568758	0.633313	6	-0.0925409	-0.0541292	1	5	Down
	TNC	0.00570507	0.633313	6	-0.129896	-0.0662017	1	5	Down
	RAB20	0.00571383	0.633313	6	-0.113931	-0.0954959	1	5	Down
	LYL1	0.00578771	0.635404	6	-0.114535	-0.130622	1	5	Down
	CRYM	0.00581502	0.635404	6	-0.0844416	-0.0815594	1	5	Down
	COL4A5	0.00585097	0.635404	6	-0.0595138	-0.0467714	1	5	Down
	HCN4	0.00587145	0.635404	6	-0.0709986	-0.0291744	3	3	Down
	TAF4B	0.00587155	0.635404	6	-0.0938969	-0.0648726	0	6	Down
	TMCO5A	0.00591317	0.635404	6	-0.251306	-0.0323839	0	6	Down
	ENPP6	0.00596797	0.635404	6	-0.123571	-0.0380359	0	6	Down
	CENPF	0.00596797	0.635404	6	-0.189168	-0.0549959	0	6	Down
	ARMC6	0.00598416	0.635404	6	-0.0512348	-0.039312	0	6	Down
	CENPM	0.00601345	0.635404	6	-0.0987839	-0.0726675	1	5	Down
	KCNIP2	0.00603172	0.635404	6	-0.0884789	-0.0455798	1	5	Down
	EGFLAM	0.00605259	0.635404	6	-0.0438185	-0.0303527	0	6	Down
	PIM2	0.00606242	0.635404	6	-0.0538011	-0.0261465	0	6	Down
	LOC101930150	0.00607622	0.635404	3	-0.218149	-0.201328	0	3	Down
	PITX2	0.00608212	0.635404	6	-0.0466494	-0.0307894	0	6	Down
	MYRIP	0.00611887	0.635404	6	-0.100429	-0.0306894	3	3	Down
	PCDHB12	0.00616438	0.635404	6	-0.0595081	-0.0129122	2	4	Down
	SOX5	0.00616438	0.635404	6	-0.0945948	0.00827626	3	3	Down
	NDUFA12	0.00616438	0.635404	6	-0.043642	-0.0281138	2	4	Down
	SLC9A4	0.00616438	0.635404	3	-0.177176	-0.139862	0	3	Down
	GABRA2	0.00616809	0.635404	6	-0.205702	-0.0331014	0	6	Down
	ACPT	0.00619302	0.636101	6	-0.0504317	-0.0969643	2	4	Down
	KCNH2	0.0062425	0.639309	6	-0.0446905	-0.0504666	2	4	Down
	CXCL11	0.00632608	0.642612	6	-0.0502962	-0.0418138	0	6	Down
	AADAT	0.00634308	0.642612	6	-0.0996688	-0.0299764	0	6	Down
	ABHD14A	0.00641098	0.64436	6	-0.0508723	0.0175813	4	2	Down
	PLCB4	0.00642179	0.64436	6	-0.375343	-0.0299996	0	6	Down
	FKBP1A	0.00643263	0.64436	6	-0.082094	-0.131433	2	4	Down
	C19orf57	0.006439	0.64436	6	-0.0370467	-0.0202745	0	6	Down
	YPEL4	0.0065222	0.650826	6	-0.103124	-0.0470556	1	5	Down
	KCNH8	0.0065736	0.651204	6	-0.0467121	-0.082342	2	4	Down
	SLC6A15	0.00658564	0.651204	6	-0.209851	-0.052649	1	5	Down
	EPSTI1	0.00658867	0.651204	6	-0.250595	-0.247027	0	6	Down
	SEMA6B	0.00660035	0.651204	6	-0.0404916	-0.0594644	1	5	Down
	SLITRK1	0.00665217	0.654473	6	-0.0438504	-0.0334771	0	6	Down
	POU2AF1	0.00671108	0.658419	3	-0.154252	-0.189908	1	2	Down
	NFIA	0.0067545	0.660758	6	-0.103808	-0.0537355	3	3	Down
	H2AFX	0.0067889	0.660758	6	-0.0414152	-0.0746074	1	5	Down
	TYR	0.00679152	0.660758	6	-0.116534	-0.043891	0	6	Down
	FLJ16734	0.00686954	0.662617	6	-0.0918067	-0.0516954	1	5	Down
	CENPA	0.00688545	0.662617	5	-0.0821922	-0.0563754	0	5	Down
	TDH	0.0068894	0.662617	6	-0.0660508	-0.0643098	0	6	Down
	NTRK3	0.00693051	0.662617	6	-0.100893	-0.0769029	1	5	Down
	PDE1A	0.00695092	0.662617	6	-0.0755111	-0.0663237	1	5	Down
	PTPN22	0.00701788	0.662617	6	-0.00326587	-0.0380518	2	4	Down
	MEGF10	0.00702275	0.662617	6	-0.0923866	-0.0443941	1	5	Down
	SCARA5	0.0070257	0.662617	6	-0.11361	-0.0944638	1	5	Down
	RARA	0.00706226	0.662617	5	-0.185303	-0.0476078	2	3	Down
	TRPC4	0.00707378	0.662617	6	-0.160858	-0.0261503	0	6	Down
	SLC5A12	0.00711242	0.662617	6	-0.102739	-0.0845518	1	5	Down
	EMCN	0.00713365	0.662617	6	-0.163266	-0.0277858	0	6	Down
	CNR1	0.00717863	0.662617	6	-0.0216662	-0.0664741	1	5	Down
	FCGR2C	0.00718668	0.662617	5	-0.192551	-0.245093	1	4	Down
	MTAP	0.00719127	0.662617	6	-0.0348404	0.022869	3	3	Down
	LOC100128485	0.00719127	0.662617	2	-0.169018	-0.169018	1	1	Down
	CCDC83	0.00720528	0.662617	6	-0.0980683	-0.0278396	0	6	Down
	CXCR3	0.00720791	0.662617	6	-0.0253637	-0.144455	2	4	Down
	AIPL1	0.00731059	0.668547	6	-0.0877498	-0.0468821	1	5	Down
	BEND3	0.00734254	0.66972	6	-0.0825496	-0.0832731	1	5	Down
	LIFR	0.00739067	0.672359	6	-0.130101	-0.0515899	1	5	Down
	DLX6	0.0074822	0.677663	6	-0.25631	-0.0410335	0	6	Down
	RHCE	0.00748767	0.677663	6	-0.114384	-0.0490396	1	5	Down
	COL25A1	0.00752023	0.678856	6	-0.0739934	-0.0465505	1	5	Down
	PRPH2	0.00758831	0.68196	6	-0.0754176	-0.0554554	0	6	Down
	COL14A1	0.00762405	0.68196	6	-0.103578	-0.0734363	1	5	Down
	RALGPS1	0.00762416	0.68196	6	-0.123826	-0.0908025	1	5	Down
	CCDC50	0.0076325	0.68196	6	-0.0893037	-0.105606	1	5	Down
	DUSP4	0.00766372	0.683007	6	-0.0828555	-0.0385328	0	6	Down
	ETV1	0.00784066	0.686354	6	-0.0890139	-0.0611031	0	6	Down
	UGT1A1	0.00788768	0.686354	5	-0.0532702	-0.0511837	2	3	Down
	AKR1B10	0.00793126	0.686354	6	-0.126159	-0.028211	3	3	Down
	HMGB3	0.00794225	0.686354	6	-0.155422	-0.0730108	1	5	Down
	GPNMB	0.00798223	0.686354	6	-0.0913991	-0.0746744	1	5	Down
	ELAVL2	0.00799343	0.686354	6	-0.150729	-0.0396181	0	6	Down
	C17orf53	0.00799806	0.686354	6	-0.128933	-0.0812555	2	4	Down
	ZDHHC19	0.00801433	0.686354	6	-0.0320364	-0.0682149	2	4	Down
	HDAC5	0.00801708	0.686354	6	-0.065895	-0.0355376	0	6	Down
	EPO	0.00802297	0.686354	6	-0.0752472	-0.0730614	2	4	Down
	CENPN	0.00813116	0.686354	6	-0.124593	-0.113346	1	5	Down
	ADAMTSL1	0.00813589	0.686354	6	-0.106281	-0.0452871	2	4	Down
	PTPRK	0.00813783	0.686354	6	-0.166237	-0.0816839	0	6	Down
	TANK	0.00817087	0.686354	6	-0.024379	-0.0771756	2	4	Down
	NAALAD2	0.00817562	0.686354	6	-0.178356	-0.0336301	0	6	Down
	FOXM1	0.00821236	0.686354	6	-0.0979603	-0.0729292	1	5	Down
	OPTC	0.00821587	0.686354	6	-0.108694	-0.0327688	2	4	Down
	TMEM259	0.008218	0.686354	4	-0.0859574	-0.202152	1	3	Down
	TTC24	0.008218	0.686354	3	-0.116902	-0.0442202	0	3	Down
	LOC646821	0.008218	0.686354	2	-0.11868	-0.11868	0	2	Down
	SLAMF8	0.00822354	0.686354	6	-0.0858475	-0.136788	1	5	Down
	SATB2	0.00823567	0.686354	6	-0.0554231	-0.0647452	1	5	Down
	EPB41L2	0.00824997	0.686354	6	-0.0653813	-0.0641332	2	4	Down
	STX7	0.00831889	0.6868	6	-0.0269147	-0.117845	2	4	Down
	AQP4-AS1	0.00833515	0.6868	4	-0.152665	-0.155146	1	3	Down
	IL22RA1	0.00833515	0.6868	6	-0.0597626	-0.0324347	2	4	Down
	TRIM14	0.00833534	0.6868	6	-0.0925129	-0.0620977	1	5	Down
	ADH1B	0.0084011	0.6868	6	-0.0990987	-0.0575478	0	6	Down
	FOXP3	0.00840833	0.6868	6	-0.061527	0.0141815	4	2	Down
	HNF1A	0.0084122	0.6868	6	-0.0456415	-0.0356802	1	5	Down
	RAG2	0.00847451	0.689253	6	-0.039758	-0.02826	0	6	Down
	CDH7	0.00848159	0.689253	6	-0.260542	-0.053353	1	5	Down
	MGAT4C	0.00853537	0.689882	6	-0.223992	-0.0401416	0	6	Down
	WNT2	0.00854952	0.689882	6	-0.0463402	-0.0347042	1	5	Down
	GNG12	0.00858782	0.689882	6	-0.0971295	-0.0493286	0	6	Down
	ZNF747	0.00858782	0.689882	6	-0.0876476	-0.0807111	0	6	Down
	MT1H	0.00866428	0.692483	6	-0.12677	-0.116271	1	5	Down
	EBF1	0.00870077	0.692483	5	-0.18744	-0.165731	0	5	Down
	YIPF2	0.0087157	0.692483	6	-0.0705873	-0.0403023	0	6	Down
	SLC12A3	0.00871906	0.692483	6	-0.079747	-0.062857	1	5	Down
	ABCC6	0.00890005	0.705258	6	-0.0667254	-0.0696767	1	5	Down
	PDE6C	0.0089853	0.706969	6	-0.198564	-0.0430133	0	6	Down
	CD8B	0.00899645	0.706969	6	-0.0435295	-0.0779187	2	4	Down
	GRHL3	0.00902207	0.706969	6	-0.0816646	-0.0385381	1	5	Down
	IGFBP4	0.00903548	0.706969	6	-0.0840351	-0.0676938	0	6	Down
	HTRA1	0.00905973	0.706969	6	-0.11134	-0.0526101	1	5	Down
	ITGBL1	0.00907075	0.706969	6	-0.0113822	-0.0450758	2	4	Down
	MAD2L1	0.00909071	0.706969	6	-0.0693862	-0.147864	2	4	Down
	PPM1K	0.00910018	0.706969	6	-0.101031	-0.149882	2	4	Down
	ADARB2	0.00921797	0.706969	6	-0.112346	-0.0610278	1	5	Down
	TTBK1	0.00922617	0.706969	6	-0.0652101	-0.030258	2	4	Down
	LOC101929657	0.00924459	0.706969	3	-0.018982	-0.00476283	1	2	Down
	RUNDC3B	0.00924459	0.706969	6	-0.0865863	-0.0347454	1	5	Down
	RUNDC3A	0.00924459	0.706969	6	-0.122503	-0.0609617	3	3	Down
	LOC100128498	0.00924459	0.706969	2	-0.132965	-0.132965	0	2	Down
	LOC145837	0.00927547	0.707785	5	-0.159829	-0.0278707	0	5	Down
	SORCS2	0.00942628	0.71726	6	-0.0951145	-0.0540922	2	4	Down
	SALL3	0.00944059	0.71726	6	-0.0553465	-0.0630548	0	6	Down
	HFM1	0.00950825	0.718763	6	-0.12355	-0.0537839	1	5	Down
	GLUL	0.00953439	0.718763	6	-0.141207	-0.165933	1	5	Down
	DOCK1	0.00955318	0.718763	6	-0.0628339	-0.0511775	2	4	Down
	ANKDD1A	0.00956299	0.718763	6	-0.142287	-0.107543	1	5	Down
	ZFP41	0.0096	0.7191	6	-0.0630917	-0.0629377	0	6	Down
	AADAC	0.00968019	0.721202	6	-0.0159763	-0.0158868	0	6	Down
	TGIF1	0.00969121	0.721202	6	-0.0679011	-0.0889119	1	5	Down
	PHLDB3	0.00970112	0.721202	6	-0.091564	-0.0850566	1	5	Down
	SLIT1	0.00971898	0.721202	6	-0.0671927	-0.0339424	1	5	Down
	TSLP	0.00975792	0.721611	6	-0.0373745	-0.0287893	0	6	Down
	POU2F1	0.00981612	0.721611	6	-0.0898033	-0.065935	2	4	Down
	XKR4	0.00981901	0.721611	6	-0.297413	-0.0255444	0	6	Down
	IVL	0.00983618	0.721611	6	-0.0437983	-0.0170268	0	6	Down
	SLC15A1	0.00986835	0.721611	6	-0.0610879	-0.0394744	2	4	Down
	NUSAP1	0.00990634	0.721611	6	-0.0995828	-0.14726	1	5	Down
	STRBP	0.00994128	0.721611	6	-0.112986	-0.117064	2	4	Down
	AP3B2	0.00995949	0.721611	6	-0.0898747	-0.031957	0	6	Down
	TLR10	0.00997407	0.721611	6	-0.00497611	-0.0677482	2	4	Down
	AP1S1	0.00998072	0.721611	6	-0.0714227	-0.0994269	1	5	Down
	FBXO17	0.00999185	0.721611	6	-0.0574411	-0.0429808	2	4	Down
	CFHR3	0.00999233	0.721611	6	-0.080309	-0.0220431	3	3	Down
	BRWD1	1.66e-06	0.0480327	6	0.173287	0.16712	5	1	UP
	MAN2A2	2.85e-06	0.0480327	6	0.110778	0.0829522	4	2	UP
	YTHDC1	1.51e-05	0.0853096	6	0.194	0.169628	6	0	UP
	AHNAK	1.55e-05	0.0853096	6	0.233076	0.21463	5	1	UP
	PPFIA1	1.71e-05	0.0853096	6	0.172119	0.116511	5	1	UP
	SMARCA2	2.3e-05	0.0853096	6	0.237957	0.160115	6	0	UP
	RAC1	2.32e-05	0.0853096	6	0.15315	0.132274	5	1	UP
	TMX4	2.45e-05	0.0853096	6	0.160265	0.162267	6	0	UP
	MBP	2.5e-05	0.0853096	6	0.181328	0.229589	5	1	UP
	CHFR	2.53e-05	0.0853096	6	0.0879331	0.0712327	6	0	UP
	SEMA4C	2.85e-05	0.0874848	6	0.123809	0.108478	4	2	UP
	DHRS7	3.29e-05	0.0922996	6	0.146485	0.160428	5	1	UP
	SSX2IP	3.95e-05	0.102419	6	0.177631	0.108015	6	0	UP
	RAB27B	5.11e-05	0.115252	6	0.217945	0.21221	6	0	UP
	RDH11	5.13e-05	0.115252	6	0.116951	0.1141	5	1	UP
	PABPC1	5.94e-05	0.11806	6	0.11977	0.121816	6	0	UP
	MALAT1	5.99e-05	0.11806	6	0.167969	0.0848868	4	2	UP
	HABP4	6.3e-05	0.11806	6	0.270616	0.125584	6	0	UP
	UBL3	6.72e-05	0.119252	6	0.159068	0.118133	5	1	UP
	SYTL3	7.11e-05	0.119854	6	0.152693	0.165319	5	1	UP
	MAF	7.73e-05	0.12416	6	0.198271	0.13238	6	0	UP
	TPM4	9.55e-05	0.138718	6	0.156347	0.15227	5	1	UP
	HIPK2	0.000100464	0.138718	6	0.178091	0.176838	5	1	UP
	LTBP1	0.000109028	0.138718	6	0.125549	0.0748078	6	0	UP
	MAP2K1	0.000110269	0.138718	6	0.123126	0.116744	4	2	UP
	CSAD	0.000110957	0.138718	6	0.147273	0.113069	6	0	UP
	RBM39	0.000111103	0.138718	6	0.067946	0.0709503	4	2	UP
	SP2	0.000120085	0.144578	6	0.0711941	0.111917	4	2	UP
	GATA2	0.000126774	0.14512	6	0.204664	0.132516	5	1	UP
	RNF145	0.000132696	0.14512	6	0.084202	0.0473429	4	2	UP
	CHD3	0.00013555	0.14512	6	0.113688	0.111944	6	0	UP
	RAB27A	0.000141391	0.14512	6	0.165436	0.225458	4	2	UP
	ZMYND11	0.000143777	0.14512	6	0.126545	0.122818	5	1	UP
	AZIN1	0.000147467	0.14512	6	0.161136	0.171558	5	1	UP
	PNN	0.000152789	0.14512	6	0.221909	0.0941446	4	2	UP
	APPBP2	0.000158517	0.14512	6	0.11604	0.114843	5	1	UP
	UBE4B	0.000165905	0.14512	6	0.145598	0.120958	5	1	UP
	DDX5	0.000167302	0.14512	6	0.130217	0.0972929	5	1	UP
	TGFBI	0.000171522	0.14512	6	0.2238	0.229941	5	1	UP
	TRIM24	0.000172987	0.14512	6	0.121217	0.110299	5	1	UP
	ALDH3A2	0.000177056	0.14512	6	0.102464	0.102505	5	1	UP
	ITGB2	0.000181908	0.14512	6	0.300261	0.166554	4	2	UP
	ANKRD12	0.000186952	0.14512	6	0.168626	0.101559	4	2	UP
	LAT2	0.000189412	0.14512	6	0.0994156	0.150746	4	2	UP
	YY1	0.000193837	0.14521	6	0.130715	0.137728	4	2	UP
	STK4	0.000205395	0.149557	6	0.11847	0.136698	5	1	UP
	ZNF117	0.000208513	0.149557	6	0.150623	0.0800639	4	2	UP
	MKLN1	0.000215623	0.151435	6	0.0753481	0.118758	4	2	UP
	CTSZ	0.000225627	0.153999	6	0.302438	0.202057	5	1	UP
	FBXW2	0.000228411	0.153999	6	0.105211	0.08512	6	0	UP
	WHSC1L1	0.000237142	0.155627	6	0.0762646	0.108358	4	2	UP
	SYT7	0.000243572	0.155627	6	0.0756553	0.0563154	5	1	UP
	SNRK	0.000248522	0.155627	6	0.158724	0.107807	5	1	UP
	ATP6AP2	0.000249291	0.155627	6	0.165473	0.138926	6	0	UP
	UPF3A	0.000260937	0.159935	6	0.146988	0.131746	5	1	UP
	WDR37	0.000266278	0.160137	6	0.112034	0.120262	5	1	UP
	PRKAA1	0.000270767	0.160137	6	0.128648	0.111274	5	1	UP
	ABCB1	0.000278832	0.161393	6	0.209139	0.128281	6	0	UP
	YES1	0.000282466	0.161393	6	0.229292	0.217563	6	0	UP
	ELP2	0.000291064	0.163535	6	0.193206	0.0585665	5	1	UP
	MYL6	0.000298092	0.164737	6	0.139504	0.0851428	5	1	UP
	ARL4C	0.000325174	0.174735	6	0.140892	0.166419	5	1	UP
	MNT	0.000332845	0.174735	6	0.134709	0.113939	5	1	UP
	FAR1	0.000335438	0.174735	6	0.167908	0.150537	4	2	UP
	PTPN11	0.00033857	0.174735	6	0.131921	0.106865	4	2	UP
	DAP3	0.0003421	0.174735	6	0.153433	0.117433	5	1	UP
	NCOR2	0.000360302	0.181286	6	0.104837	0.0935805	6	0	UP
	PCBP2	0.000384616	0.187804	6	0.127587	0.101522	6	0	UP
	ZNF143	0.000386811	0.187804	6	0.11558	0.12034	5	1	UP
	SAFB2	0.00038997	0.187804	6	0.123624	0.119524	5	1	UP
	TNPO1	0.000408533	0.19386	6	0.104893	0.086448	5	1	UP
	ZBTB43	0.000420499	0.19386	6	0.068612	0.143304	4	2	UP
	ARAP2	0.000424785	0.19386	6	0.129647	0.152269	4	2	UP
	C4orf46	0.000430923	0.19386	6	0.165996	0.0698535	6	0	UP
	THAP6	0.000431299	0.19386	6	0.100036	0.0766205	6	0	UP
	FEZ1	0.000441663	0.195906	6	0.0906801	0.114544	4	2	UP
	LUC7L	0.000448095	0.196178	6	0.122645	0.12655	6	0	UP
	LUC7L3	0.000466696	0.201702	4	0.230278	0.268604	3	1	UP
	MTERF4	0.000491177	0.208757	4	0.196709	0.209284	4	0	UP
	ANKRD28	0.000503651	0.208757	6	0.0948266	0.00956289	3	3	UP
	ZNF7	0.000507524	0.208757	6	0.0758166	0.0657655	6	0	UP
	GRAMD4	0.000516646	0.208757	6	0.0888731	0.0520807	6	0	UP
	ZFAND5	0.000522606	0.208757	6	0.151095	0.114749	5	1	UP
	EIF4E	0.000525795	0.208757	6	0.1509	0.107844	5	1	UP
	RUFY1	0.000549424	0.208757	6	0.146221	0.104012	6	0	UP
	PPM1B	0.000553558	0.208757	6	0.196782	0.118673	6	0	UP
	ZNF292	0.000555099	0.208757	6	0.135287	0.0292782	4	2	UP
	SLC35C2	0.000562917	0.208757	6	0.0608172	0.0545499	6	0	UP
	HNRNPU	0.00056706	0.208757	6	0.163524	0.158262	5	1	UP
	C6orf62	0.000573267	0.208757	6	0.0788303	0.102832	5	1	UP
	ING1	0.000574757	0.208757	6	0.0909691	0.0560449	5	1	UP
	RC3H2	0.000575896	0.208757	6	0.115151	0.0768238	5	1	UP
	EIF3A	0.000581838	0.208757	6	0.17988	0.177753	4	2	UP
	LASP1	0.000588292	0.208757	6	0.0785449	0.0660397	6	0	UP
	RASSF5	0.000606006	0.212753	6	0.0915973	0.104954	5	1	UP
	TTC3	0.000616131	0.212753	6	0.169728	0.196488	6	0	UP
	AHSA1	0.000622902	0.212753	6	0.0742259	0.0244078	4	2	UP
	TAF5L	0.000624796	0.212753	6	0.0953144	0.0424237	6	0	UP
	MS4A3	0.000645586	0.217634	6	0.227434	0.186398	6	0	UP
	AKR1C3	0.000653239	0.217755	6	0.319181	0.258419	6	0	UP
	SF3A1	0.000658867	0.217755	6	0.111767	0.104663	4	2	UP
	STAT4	0.000682804	0.21978	6	0.163953	0.103876	6	0	UP
	CD44	0.000685763	0.21978	6	0.0693654	0.0752943	3	3	UP
	SORBS3	0.000688095	0.21978	6	0.139871	0.118914	5	1	UP
	ING3	0.00069107	0.21978	6	0.120841	0.167954	4	2	UP
	GOLGA4	0.000708635	0.219914	6	0.190795	0.150767	6	0	UP
	ALMS1	0.000709515	0.219914	6	0.0626365	0.0910218	5	1	UP
	CALCOCO2	0.000712161	0.219914	6	0.107876	0.110779	6	0	UP
	WDR82	0.000722879	0.219914	6	0.142363	0.1634	5	1	UP
	DIXDC1	0.000724108	0.219914	6	0.0794548	0.052395	6	0	UP
	MGEA5	0.000768542	0.231324	6	0.148848	0.171667	4	2	UP
	SEL1L	0.000797175	0.237819	6	0.133085	0.121097	5	1	UP
	KBTBD2	0.000812283	0.240201	6	0.123496	0.136305	5	1	UP
	PNISR	0.000833361	0.242238	4	0.179022	0.173045	3	1	UP
	CCNI	0.000833544	0.242238	6	0.0723539	0.0977622	5	1	UP
	MACF1	0.000852291	0.244194	6	0.153325	0.155868	5	1	UP
	BCAP31	0.000854761	0.244194	6	0.103712	0.117081	5	1	UP
	OXR1	0.000868048	0.244254	6	0.143516	0.0880636	4	2	UP
	LOC648987	0.000884829	0.244254	6	0.0523386	0.0408472	3	3	UP
	ITGAL	0.000895436	0.244254	6	0.14596	0.078808	6	0	UP
	DDX6	0.000900203	0.244254	6	0.0820559	0.12446	5	1	UP
	CD36	0.000920627	0.244254	6	0.108908	0.14477	4	2	UP
	ZNF333	0.000924185	0.244254	6	0.136111	0.0823016	6	0	UP
	TPM1	0.000926318	0.244254	6	0.166796	0.0894543	6	0	UP
	DDIT4	0.000928587	0.244254	6	0.196114	0.173221	6	0	UP
	HNRNPA2B1	0.000949955	0.244254	6	0.18427	0.158898	5	1	UP
	NBEAL2	0.000949955	0.244254	6	0.101705	0.00734795	3	3	UP
	KHNYN	0.000950578	0.244254	6	0.0818538	0.0824209	5	1	UP
	YLPM1	0.00096734	0.244254	6	0.122213	0.110665	5	1	UP
	MAP2K4	0.000969048	0.244254	6	0.0781017	0.151294	4	2	UP
	ZCCHC14	0.000986992	0.244254	6	0.154802	0.0790545	6	0	UP
	MYO5A	0.00100224	0.244254	6	0.19017	0.098245	5	1	UP
	RALBP1	0.00100272	0.244254	6	0.0727543	0.115213	5	1	UP
	ZC3H14	0.00100736	0.244254	6	0.11563	0.0936752	5	1	UP
	PPT1	0.00102935	0.244254	6	0.142081	0.149885	4	2	UP
	KBTBD11	0.00104269	0.244254	6	0.179431	0.162889	6	0	UP
	PNKD	0.00105015	0.244254	6	0.0998667	0.0518685	6	0	UP
	OFD1	0.00106072	0.244254	6	0.144471	0.124987	5	1	UP
	FAF1	0.00106782	0.244254	6	0.0415563	0.00177486	3	3	UP
	SLA	0.00106782	0.244254	6	0.156481	0.165746	5	1	UP
	SCARNA17	0.00106782	0.244254	6	0.162682	0.146874	6	0	UP
	C14orf28	0.00106782	0.244254	6	0.0952822	0.0837042	5	1	UP
	NAPA-AS1	0.00106782	0.244254	3	0.175158	0.221738	3	0	UP
	MYH9	0.00106922	0.244254	6	0.190896	0.173553	5	1	UP
	AMD1	0.00107432	0.244254	6	0.130883	0.132809	5	1	UP
	ZNF641	0.00109274	0.244254	6	0.117353	0.117674	6	0	UP
	HNRNPR	0.00109509	0.244254	6	0.161459	0.17845	4	2	UP
	ZNF33A	0.00109574	0.244254	6	0.109317	0.140417	4	2	UP
	SYCP2	0.00110125	0.244254	6	0.187988	0.0751273	5	1	UP
	SKAP2	0.0011048	0.244254	6	0.20374	0.184034	5	1	UP
	TOMM20	0.0011048	0.244254	6	0.131765	0.113548	5	1	UP
	AAGAB	0.00111097	0.244254	6	0.104579	0.0763428	4	2	UP
	EIF2S3	0.00111581	0.244254	6	0.128541	0.124646	6	0	UP
	CSDE1	0.001157	0.249866	6	0.103263	0.116714	5	1	UP
	PKN2	0.00116355	0.249866	6	0.134542	0.171347	4	2	UP
	RSBN1L	0.00116368	0.249866	6	0.119755	0.101635	5	1	UP
	TGFBR1	0.00118654	0.252598	6	0.149312	0.0529738	5	1	UP
	CA13	0.00119538	0.252598	6	0.0856916	0.0486485	6	0	UP
	DAB2	0.00120862	0.252598	6	0.174114	0.156609	5	1	UP
	BCL2	0.0012124	0.252598	6	0.1311	0.152751	4	2	UP
	CHD4	0.00122599	0.252598	6	0.165649	0.210402	5	1	UP
	CDK5RAP2	0.0012316	0.252598	6	0.16114	0.136024	5	1	UP
	OSBPL5	0.00124482	0.252598	6	0.147028	0.0870719	5	1	UP
	IQGAP2	0.0012494	0.252598	6	0.1554	0.114052	5	1	UP
	ATP6V1A	0.00126184	0.252598	6	0.0818177	0.146071	5	1	UP
	SERPINB6	0.00126479	0.252598	6	0.159952	0.154696	6	0	UP
	ASAH1	0.00126572	0.252598	6	0.110902	0.091848	6	0	UP
	GRK5	0.00127998	0.252598	6	0.0920331	0.0641707	5	1	UP
	DCUN1D4	0.00129125	0.252598	6	0.114122	0.103879	5	1	UP
	ZNF91	0.00130033	0.252598	6	0.143283	0.134376	4	2	UP
	GPATCH8	0.0013145	0.252598	6	0.105168	0.0832709	6	0	UP
	APLP2	0.00132182	0.252598	6	0.140896	0.158162	4	2	UP
	HECTD1	0.00132986	0.252598	6	0.172091	0.185174	5	1	UP
	CYBRD1	0.0013342	0.252598	6	0.180757	0.173373	5	1	UP
	ALCAM	0.00134357	0.252598	6	0.132147	0.112907	5	1	UP
	USP48	0.001346	0.252598	6	0.13059	0.14524	4	2	UP
	RUNX3	0.00136827	0.252598	6	0.255784	0.160619	4	2	UP
	PTPN12	0.00137298	0.252598	6	0.198225	0.157907	5	1	UP
	DCP2	0.0013735	0.252598	6	0.0842347	0.0898368	4	2	UP
	EIF3L	0.00137469	0.252598	6	0.107351	0.0896439	6	0	UP
	NOTCH1	0.00137875	0.252598	6	0.101339	0.0675681	4	2	UP
	ZBTB34	0.00138289	0.252598	6	0.0583532	0.0950657	4	2	UP
	TM2D3	0.00138401	0.252598	6	0.104541	0.0594711	4	2	UP
	CNPY3	0.00138621	0.252598	6	0.101788	0.0734233	4	2	UP
	SSR1	0.00140287	0.254149	6	0.130366	0.108216	5	1	UP
	ELMO2	0.00140981	0.254149	6	0.092905	0.0974893	5	1	UP
	PRMT2	0.00142052	0.254718	6	0.118277	0.120924	5	1	UP
	NIN	0.00142813	0.254728	6	0.0656617	0.0879641	4	2	UP
	OSTM1	0.00144345	0.256106	6	0.0426767	0.0760382	4	2	UP
	IFRD1	0.00146444	0.25847	6	0.181169	0.129877	3	3	UP
	FCER1A	0.00149802	0.260943	6	0.228043	0.253775	5	1	UP
	ESD	0.00149826	0.260943	6	0.0982841	0.0752805	5	1	UP
	UPF2	0.00150857	0.260943	6	0.105663	0.0628915	4	2	UP
	ZMYND8	0.00150942	0.260943	6	0.12533	0.0686642	5	1	UP
	CEBPG	0.00152533	0.26235	6	0.108797	0.0639923	4	2	UP
	BUB3	0.00155634	0.265536	6	0.117513	0.147693	5	1	UP
	CLK2	0.00155962	0.265536	6	0.0865065	0.0753477	5	1	UP
	TLE4	0.00157904	0.265977	6	0.104311	0.0791782	5	1	UP
	MMP25	0.00157904	0.265977	6	0.148093	0.112355	4	2	UP
	GNPTAB	0.00158587	0.265977	6	0.148936	0.159145	6	0	UP
	ZNF12	0.0015994	0.266918	6	0.136913	0.0525456	3	3	UP
	EIF1	0.00161447	0.268105	6	0.0750589	0.0863542	4	2	UP
	LAMP1	0.00164613	0.269594	6	0.108385	0.0980898	5	1	UP
	DNAJB6	0.00165795	0.269594	6	0.154323	0.158033	4	2	UP
	FXR1	0.00165795	0.269594	6	0.122305	0.050775	4	2	UP
	RBM8A	0.00166224	0.269594	6	0.146299	0.125614	5	1	UP
	PTPN4	0.00166397	0.269594	6	0.152585	0.134909	6	0	UP
	DIAPH1	0.00167578	0.269594	6	0.166014	0.148302	5	1	UP
	NKTR	0.00167941	0.269594	6	0.121203	0.0653227	5	1	UP
	BAZ2B	0.00169153	0.270252	6	0.114014	0.120161	3	3	UP
	LGR6	0.00171788	0.271314	6	0.107804	0.0809332	5	1	UP
	LPIN2	0.00173237	0.271314	6	0.103402	0.146893	5	1	UP
	TRMT6	0.00173875	0.271314	6	0.090802	0.0603187	6	0	UP
	ZNF26	0.00174626	0.271314	6	0.225297	0.184961	5	1	UP
	VPS4B	0.00174626	0.271314	6	0.123974	0.09607	5	1	UP
	DAZAP1	0.00175324	0.271314	6	0.0495207	0.03789	6	0	UP
	SLMAP	0.00175451	0.271314	6	0.0814362	0.0540409	4	2	UP
	GGNBP2	0.0017849	0.273702	6	0.0865437	0.0867568	4	2	UP
	SDPR	0.0017862	0.273702	6	0.308165	0.148611	6	0	UP
	RBM17	0.00182112	0.275471	6	0.110124	0.111835	5	1	UP
	TACC1	0.00182701	0.275471	6	0.119182	0.0957758	5	1	UP
	ITSN2	0.0018322	0.275471	6	0.11345	0.060428	6	0	UP
	NRCAM	0.00183724	0.275471	6	0.0986795	0.09765	6	0	UP
	ZNF441	0.00186096	0.275471	6	0.184033	0.130213	5	1	UP
	SPAG9	0.00187204	0.275471	6	0.158386	0.16461	5	1	UP
	PFDN5	0.00187393	0.275471	6	0.286487	0.0836907	6	0	UP
	EFCAB7	0.00187773	0.275471	6	0.132343	0.0949069	5	1	UP
	PLCB2	0.0018792	0.275471	6	0.116595	0.109293	6	0	UP
	CXorf57	0.00187946	0.275471	6	0.215475	0.130599	4	2	UP
	RUNDC1	0.0019083	0.278488	6	0.0872839	0.0853465	5	1	UP
	MYLIP	0.00192567	0.279812	6	0.128645	0.120099	6	0	UP
	DDX3X	0.00193732	0.280297	6	0.163594	0.205845	5	1	UP
	BTG1	0.00197352	0.282339	6	0.097375	0.0872509	6	0	UP
	ANTXR2	0.00200188	0.282339	6	0.0944032	0.0853192	4	2	UP
	CBL	0.00200188	0.282339	6	0.0379597	-0.0097464	3	3	UP
	ST3GAL3	0.00202043	0.282339	6	0.0920972	0.0855343	5	1	UP
	AHCTF1	0.00202682	0.282339	5	0.165301	0.113975	4	1	UP
	CDK5RAP1	0.00204269	0.282339	6	0.0654591	0.0657197	6	0	UP
	ZNF700	0.00208665	0.282339	6	0.123044	0.0540924	3	3	UP
	PDGFD	0.00209669	0.282339	6	0.161156	0.0866612	6	0	UP
	USP7	0.00210007	0.282339	6	0.130603	0.142684	6	0	UP
	TPCN2	0.00210344	0.282339	6	0.108942	0.110079	4	2	UP
	SEMA4D	0.00210736	0.282339	6	0.123062	0.133987	5	1	UP
	CCDC65	0.0021084	0.282339	6	0.295323	0.0915626	5	1	UP
	CACNG6	0.0021136	0.282339	6	0.0040834	0.0613756	4	2	UP
	HCLS1	0.00211699	0.282339	6	0.138052	0.152322	5	1	UP
	ATP8B4	0.00212039	0.282339	6	0.189965	0.191154	4	2	UP
	PIP4K2B	0.00213548	0.282339	6	0.120975	0.0994792	5	1	UP
	SULF2	0.00213548	0.282339	6	0.174624	0.147873	5	1	UP
	ZSCAN18	0.00213548	0.282339	6	0.0112358	0.049546	4	2	UP
	IP6K1	0.00213548	0.282339	6	0.0472567	0.0644522	4	2	UP
	TIGD7	0.00213548	0.282339	6	0.279836	0.0755179	5	1	UP
	NR3C2	0.00213548	0.282339	6	0.117467	0.102044	4	2	UP
	IRF2BP2	0.00214808	0.282339	6	0.110804	0.0671932	6	0	UP
	NBAS	0.00215244	0.282339	6	0.17615	0.0686209	6	0	UP
	ZIK1	0.00215244	0.282339	6	0.0816085	0.0741203	5	1	UP
	POLR3H	0.00218221	0.282916	6	0.029536	0.0476001	5	1	UP
	IFFO2	0.00220583	0.282916	6	0.0702332	0.0720503	4	2	UP
	IGF2R	0.00224895	0.282916	6	0.203805	0.245442	5	1	UP
	AP2A2	0.00225198	0.282916	6	0.0661312	0.0454325	6	0	UP
	ST3GAL6	0.00225814	0.282916	6	0.111867	0.0809423	4	2	UP
	ACTN1	0.00227032	0.282916	6	0.128618	0.14447	5	1	UP
	CYTH2	0.00227124	0.282916	6	0.125848	0.142251	5	1	UP
	PRNP	0.00227124	0.282916	6	0.129262	0.117018	5	1	UP
	CDK5RAP3	0.00227796	0.282916	6	0.113274	0.106062	5	1	UP
	NT5DC1	0.00228229	0.282916	6	0.0545367	0.0660213	5	1	UP
	EIF3D	0.00229106	0.282916	6	0.105697	0.104176	6	0	UP
	PSME3	0.00229257	0.282916	6	0.0117272	0.00960155	3	3	UP
	ZBTB16	0.00229712	0.282916	6	0.160833	0.0732748	6	0	UP
	METTL9	0.00230266	0.282916	5	0.100533	0.113189	4	1	UP
	ZNF701	0.00230989	0.282916	6	0.144652	0.0753514	4	2	UP
	FKBP3	0.00231345	0.282916	6	0.12369	0.115513	5	1	UP
	ZNF197	0.0023261	0.282916	6	0.113349	0.0847273	6	0	UP
	STX6	0.00233168	0.282916	6	0.00662223	0.07389	4	2	UP
	FBXO22	0.00233898	0.282916	6	0.111971	0.0937714	4	2	UP
	SH3BP5	0.00234148	0.282916	6	0.0989348	0.0624117	6	0	UP
	DARS	0.00238366	0.284473	6	0.133407	0.103966	5	1	UP
	ETS1	0.00238595	0.284473	6	0.152138	0.17022	5	1	UP
	RPL41	0.00238654	0.284473	6	0.0902564	0.0645571	6	0	UP
	AGFG2	0.00238903	0.284473	6	0.147129	0.10227	4	2	UP
	PCNP	0.00239656	0.284473	6	0.147399	0.095295	5	1	UP
	AMICA1	0.0024192	0.285379	5	0.110361	-0.0409714	2	3	UP
	CTDSP2	0.00242751	0.285379	6	0.0999397	0.10384	5	1	UP
	MMGT1	0.00244189	0.285379	6	0.0823429	0.068192	6	0	UP
	SEC22C	0.00244657	0.285379	6	0.0695827	0.104227	4	2	UP
	COL6A2	0.00246257	0.285379	6	0.100284	0.0714012	5	1	UP
	SPATA2	0.00247268	0.285379	6	0.0949748	0.108264	5	1	UP
	ZDHHC20	0.00247722	0.285379	6	0.137685	0.096053	6	0	UP
	ZNF224	0.00248038	0.285379	6	0.171429	0.139261	5	1	UP
	SIRPA	0.00250178	0.286862	6	0.0910351	0.0305591	3	3	UP
	ZNF274	0.00252961	0.28703	6	0.0447539	0.0721946	4	2	UP
	RAB1A	0.00255411	0.28703	6	0.153536	0.187026	4	2	UP
	CASK	0.00256244	0.28703	6	0.102932	0.0700139	6	0	UP
	PIK3R1	0.00256582	0.28703	6	0.125134	0.128999	5	1	UP
	TERF2IP	0.00257576	0.28703	6	0.089596	0.0651666	6	0	UP
	GNB1	0.00258187	0.28703	6	0.0726569	0.0636256	5	1	UP
	ADAMTS1	0.00259082	0.28703	6	0.209879	0.0641523	6	0	UP
	CNBP	0.00259701	0.28703	6	0.177565	0.102533	5	1	UP
	WDR3	0.00259724	0.28703	6	0.138879	0.131497	4	2	UP
	GAPVD1	0.00260929	0.28703	6	0.0988626	0.0945508	5	1	UP
	NLRP3	0.00262894	0.28703	6	0.484169	0.163068	4	2	UP
	APBA2	0.0026489	0.28703	6	0.0811315	0.109597	4	2	UP
	CLSTN1	0.00265521	0.28703	6	0.100988	0.102275	6	0	UP
	CLIC3	0.00266894	0.28703	6	0.284014	0.100938	6	0	UP
	STAU1	0.00267299	0.28703	6	0.0536765	0.0497575	4	2	UP
	WDR20	0.00267639	0.28703	6	0.0571702	0.0546306	5	1	UP
	TRUB1	0.00267793	0.28703	6	0.0279327	0.0777808	4	2	UP
	MATK	0.00268618	0.28703	6	0.150156	0.104328	6	0	UP
	COG2	0.00268964	0.28703	6	0.193287	0.123662	6	0	UP
	GCLM	0.00269319	0.28703	6	0.131793	0.160094	4	2	UP
	DENND2D	0.00269401	0.28703	6	0.12877	0.131319	5	1	UP
	TAX1BP1	0.00269416	0.28703	6	0.151612	0.115955	5	1	UP
	TAF3	0.00270351	0.28703	6	0.102352	0.097269	6	0	UP
	RANBP2	0.00272867	0.28703	6	0.106816	0.0442797	4	2	UP
	C3orf58	0.00273393	0.28703	6	0.125006	0.122753	5	1	UP
	FAM101B	0.00273502	0.28703	6	0.0749375	0.0617905	3	3	UP
	PTGER4	0.00274021	0.28703	6	0.136128	0.096401	6	0	UP
	SNORA21	0.00275254	0.28703	6	0.161948	0.111605	6	0	UP
	PTGS1	0.0027551	0.28703	6	0.170562	0.147806	5	1	UP
	ZNF571	0.00276314	0.28703	6	0.144202	0.111579	6	0	UP
	ATP5A1	0.002768	0.28703	6	0.0826079	0.0893628	4	2	UP
	PLCB1	0.0027757	0.28703	6	0.0873574	0.077153	5	1	UP
	CPO	0.00279158	0.287352	6	0.0551115	0.0303531	6	0	UP
	SLC7A8	0.00279587	0.287352	6	0.0655683	0.0625056	4	2	UP
	LSG1	0.00283469	0.288957	6	0.0979052	0.0922709	6	0	UP
	ITGA6	0.00284616	0.288957	6	0.0792142	0.109509	4	2	UP
	IGF1R	0.00285405	0.288957	6	0.131358	0.0622769	5	1	UP
	ZNF148	0.00286307	0.288957	6	0.0614041	0.113392	4	2	UP
	EIF4B	0.00286727	0.288957	6	0.152019	0.131548	6	0	UP
	NDUFS1	0.0028754	0.288957	6	0.123992	0.168268	5	1	UP
	VNN2	0.00287696	0.288957	6	0.151295	0.172735	4	2	UP
	DAB2IP	0.00288006	0.288957	6	0.21516	0.0607414	4	2	UP
	MUM1	0.0029052	0.290615	6	0.0566094	0.0695443	5	1	UP
	SON	0.00292714	0.291111	6	0.134947	0.129443	5	1	UP
	TERF2	0.00295577	0.291111	6	0.0969624	0.0645311	6	0	UP
	LOC93622	0.00295799	0.291111	6	0.082672	0.0623414	6	0	UP
	PPP1CB	0.00296361	0.291111	6	0.199964	0.159806	6	0	UP
	TBC1D14	0.00296525	0.291111	6	0.136837	0.115619	4	2	UP
	ACOX1	0.00296608	0.291111	6	0.147634	0.184648	5	1	UP
	NCOA1	0.00297482	0.291111	6	0.122304	0.116186	5	1	UP
	APP	0.00298574	0.291111	6	0.203041	0.14706	5	1	UP
	SART1	0.00298788	0.291111	6	0.120953	0.135335	5	1	UP
	BBS2	0.00300494	0.291447	6	0.126876	0.0883095	6	0	UP
	GUSB	0.00301844	0.291447	6	0.165305	0.0998627	6	0	UP
	ARID4A	0.00302361	0.291447	6	0.0779957	0.0511515	3	3	UP
	KCTD21	0.00302591	0.291447	6	0.0843409	0.0530706	4	2	UP
	UCHL5	0.00304362	0.291647	6	0.110631	0.106028	5	1	UP
	ZBTB38	0.00304953	0.291647	6	0.13843	0.146068	5	1	UP
	SENP5	0.00305646	0.291647	6	0.0778433	0.0829908	4	2	UP
	GIMAP8	0.00306765	0.291647	6	0.116504	0.148015	4	2	UP
	H2AFY	0.00307429	0.291647	6	0.101146	0.0595443	5	1	UP
	ARHGEF3	0.0030799	0.291647	6	0.157933	0.0954091	5	1	UP
	MADD	0.00312784	0.294881	6	0.0685293	0.0609621	6	0	UP
	ZNF740	0.00313352	0.294881	6	0.130861	0.135888	6	0	UP
	TIAL1	0.0031483	0.294881	6	0.0909663	0.0645755	5	1	UP
	DYRK1A	0.00314904	0.294881	6	0.034634	-0.0335899	2	4	UP
	TM9SF3	0.003166	0.295479	6	0.0835008	0.0382444	3	3	UP
	CHST2	0.00320299	0.295479	6	0.118568	0.0593324	3	3	UP
	MED13L	0.00320299	0.295479	6	0.0453826	0.0145552	3	3	UP
	CCDC144CP///CCDC144NL///CCDC144B///CCDC144A	0.00320299	0.295479	1	0.639204	0.639204	1	0	UP
	FMNL3	0.00321388	0.295479	6	0.0310962	0.0590523	5	1	UP
	NET1	0.00321678	0.295479	6	0.142085	0.15334	5	1	UP
	PAK2	0.0032756	0.297615	6	0.120829	0.113172	5	1	UP
	NSFL1C	0.00328699	0.297615	6	0.09887	0.13467	5	1	UP
	TSEN54	0.00328994	0.297615	6	0.10852	0.0920534	5	1	UP
	ARL3	0.00328994	0.297615	6	0.0853718	0.0799532	6	0	UP
	MAP1LC3B	0.00329411	0.297615	6	0.0578814	0.0526049	4	2	UP
	ZNF207	0.00330634	0.297615	6	0.0932834	0.0115677	4	2	UP
	FBXL5	0.00330746	0.297615	6	0.11326	0.088945	6	0	UP
	TXK	0.00331066	0.297615	6	0.180586	0.195967	5	1	UP
	GATAD2A	0.00333446	0.298165	6	0.128666	0.101232	5	1	UP
	CES2	0.00333826	0.298165	6	0.0732191	0.0496837	3	3	UP
	WDR60	0.00334331	0.298165	6	0.0195671	0.107454	4	2	UP
	SLC38A10	0.00339709	0.302162	6	0.0927615	0.126256	4	2	UP
	MAST3	0.00342554	0.30376	6	0.131054	0.207949	4	2	UP
	ATRN	0.0034463	0.30376	6	0.144941	0.0470739	5	1	UP
	PTPRE	0.00345414	0.30376	6	0.111372	0.0842042	5	1	UP
	SEC14L2	0.00345857	0.30376	6	0.112383	0.0710045	5	1	UP
	BAG5	0.00346742	0.30376	6	0.100333	0.0951237	5	1	UP
	PDZD4	0.00347538	0.30376	6	0.102226	0.106314	6	0	UP
	FUBP1	0.00347813	0.30376	6	0.188435	0.145708	5	1	UP
	AKAP12	0.00349771	0.304101	6	0.0847011	0.0711191	4	2	UP
	DOCK2	0.00350008	0.304101	6	0.104355	0.0253335	3	3	UP
	KHDRBS1	0.00351245	0.304391	6	0.0974427	0.126756	4	2	UP
	DGKD	0.00353289	0.304596	6	0.070943	0.0785256	5	1	UP
	SLC11A2	0.00355166	0.304625	6	0.0527818	0.0524835	5	1	UP
	HOPX	0.00355694	0.304625	6	0.257166	0.206388	5	1	UP
	TNPO3	0.00356033	0.304625	6	0.0949041	0.108369	4	2	UP
	TAF10	0.00357009	0.304687	6	0.106737	0.0923873	5	1	UP
	IL16	0.00359709	0.306216	6	0.096083	0.0885205	6	0	UP
	CBFA2T2	0.00362807	0.306605	6	0.122535	0.0701861	6	0	UP
	PRKCA	0.00363226	0.306605	6	0.0222467	0.0448241	4	2	UP
	MYBL1	0.00363251	0.306605	6	0.233736	0.118111	6	0	UP
	OSBPL1A	0.00364031	0.306605	6	0.0775929	0.0716591	5	1	UP
	NUCB2	0.00364714	0.306605	6	0.149228	0.172821	4	2	UP
	FCGBP	0.00366567	0.307021	6	0.109963	0.0328465	4	2	UP
	SLC16A7	0.00367239	0.307021	6	0.141706	0.118891	6	0	UP
	ALDH3B1	0.00368851	0.307021	6	0.0747031	0.101186	5	1	UP
	SMARCC2	0.00370793	0.307398	6	0.0922094	0.109465	5	1	UP
	DENND4C	0.00372743	0.307398	6	0.107059	0.118177	5	1	UP
	HERC2	0.00373069	0.307398	6	0.0913095	0.0653405	5	1	UP
	ABCC3	0.00373386	0.307398	6	0.0412452	0.0889679	4	2	UP
	SERINC1	0.00373863	0.307398	6	0.105364	0.0891357	5	1	UP
	RENBP	0.00376683	0.308963	6	0.120522	0.129571	4	2	UP
	RLF	0.00379933	0.310119	6	0.130531	0.0710509	4	2	UP
	NR3C1	0.00379933	0.310119	6	0.0941649	0.0791897	4	2	UP
	CCR2	0.00383502	0.311405	6	0.198907	0.242567	4	2	UP
	MYO9B	0.00383613	0.311405	6	0.124205	0.102742	5	1	UP
	MAPRE3	0.00384279	0.311405	6	0.109994	0.131784	5	1	UP
	CAP1	0.00390116	0.314985	6	0.0835961	0.10667	5	1	UP
	CD163	0.00392245	0.314985	6	0.220502	0.238091	4	2	UP
	ATP2C1	0.00392264	0.314985	6	0.139641	0.142597	5	1	UP
	HNRNPA1	0.00392779	0.314985	6	0.150254	0.186344	5	1	UP
	JRKL	0.00393369	0.314985	6	0.193334	0.0747156	5	1	UP
	CFLAR	0.00394344	0.315017	6	0.0874556	0.130735	4	2	UP
	TXNIP	0.00396778	0.315738	6	0.0345704	0.0971913	5	1	UP
	RBM19	0.0039712	0.315738	6	0.0908807	0.0768772	5	1	UP
	COX18	0.00402474	0.318761	6	0.0612443	0.062088	6	0	UP
	USP27X	0.00404901	0.318761	6	0.0784151	0.0595911	6	0	UP
	NDUFA10	0.00406446	0.318761	6	0.111422	0.0904178	5	1	UP
	ZNF502	0.00409792	0.318761	6	0.130482	0.0773951	6	0	UP
	UNKL	0.00410136	0.318761	6	0.0942799	0.0650859	4	2	UP
	FAM65B	0.00411242	0.318761	6	0.0654327	0.0296505	3	3	UP
	ERMP1	0.0041275	0.318761	6	0.172335	0.137327	6	0	UP
	RCOR3	0.00413465	0.318761	6	0.12446	0.0756805	5	1	UP
	RASA3	0.00414172	0.318761	6	0.146317	0.113148	5	1	UP
	FAM20C	0.00414561	0.318761	6	0.0726983	0.0793299	4	2	UP
	WDR91	0.00415478	0.318761	6	0.0565868	0.0464387	6	0	UP
	CCNY	0.0041623	0.318761	6	0.0981313	0.112621	5	1	UP
	NFIC	0.00418498	0.318761	6	0.0395472	0.0402232	3	3	UP
	CHD2	0.00418498	0.318761	6	0.105	0.0674743	5	1	UP
	MRFAP1	0.00419863	0.318761	6	0.132133	0.0716241	6	0	UP
	NRBF2	0.00419864	0.318761	6	0.150206	0.121994	3	3	UP
	SLC45A3	0.00420937	0.318761	5	0.122346	0.112677	5	0	UP
	IL27RA	0.00422952	0.318761	6	0.0612141	0.0928389	4	2	UP
	SETD3	0.00423128	0.318761	6	0.0951135	0.0899309	5	1	UP
	UBE3B	0.00425615	0.318761	6	0.0648179	0.0662581	5	1	UP
	HIST1H4F	0.00426283	0.318761	6	0.103404	0.0487077	6	0	UP
	SH2D1B	0.00427034	0.318761	6	0.299829	0.104738	6	0	UP
	ADCK4	0.00427034	0.318761	5	0.113852	0.0606539	5	0	UP
	SPG20	0.00427034	0.318761	6	0.1641	0.0791573	5	1	UP
	KIAA0247	0.00427034	0.318761	5	0.122922	0.102578	3	2	UP
	HIST1H2BG	0.00427034	0.318761	6	0.140703	0.0829512	5	1	UP
	LOC283267	0.00427034	0.318761	2	0.0914844	0.0914844	1	1	UP
	FLII	0.00428515	0.318761	6	0.127458	0.0743202	5	1	UP
	RABEP1	0.00429085	0.318761	6	0.160768	0.129143	6	0	UP
	R3HCC1L	0.00429289	0.318761	4	0.111396	0.144207	3	1	UP
	NCALD	0.00431388	0.319103	6	0.153554	0.0662542	6	0	UP
	ATP6V1C1	0.00432612	0.319103	6	0.0953644	0.107147	4	2	UP
	PCM1	0.00433445	0.319103	6	0.156315	0.125418	6	0	UP
	CDC14B	0.00433992	0.319103	6	0.0967475	0.0715024	5	1	UP
	ANKRD44	0.00435483	0.319103	6	0.117726	0.110071	4	2	UP
	SAMD1	0.00436558	0.319103	6	0.0235811	0.0454233	4	2	UP
	RPGR	0.00437212	0.319103	6	0.0865102	0.106776	4	2	UP
	CCDC149	0.00437322	0.319103	6	0.0820281	0.069686	6	0	UP
	DDX20	0.00438621	0.31936	6	0.0859598	0.0700402	6	0	UP
	DIDO1	0.00443991	0.322573	6	0.11723	0.109932	5	1	UP
	DYNC1H1	0.00445935	0.323084	6	0.126996	0.0974673	4	2	UP
	PPP1R12C	0.00446612	0.323084	6	0.0717643	0.0706575	5	1	UP
	GP1BA	0.00449623	0.324566	6	0.146557	0.124691	5	1	UP
	RRP1B	0.00450756	0.324689	6	0.0778134	0.0858772	5	1	UP
	THOC2	0.00454382	0.324975	6	0.0866404	0.122227	5	1	UP
	PDE5A	0.0045493	0.324975	6	0.0710274	0.0725139	5	1	UP
	ARID4B	0.00454992	0.324975	6	0.172776	0.133329	4	2	UP
	ESCO1	0.00455378	0.324975	6	0.107973	0.0672568	4	2	UP
	AGGF1	0.00455973	0.324975	6	0.0671922	0.0636707	4	2	UP
	PIGC	0.00457165	0.325137	6	0.100072	0.103986	5	1	UP
	MINOS1	0.00458724	0.325559	4	0.185762	0.235146	3	1	UP
	RNF135	0.00462422	0.32596	6	0.101664	0.0542852	3	3	UP
	UBA52	0.00462829	0.32596	6	0.0375755	0.0347282	6	0	UP
	PANK2	0.00463157	0.32596	6	0.216035	0.169474	4	2	UP
	ALOX12	0.00465009	0.326381	6	0.142747	0.107731	6	0	UP
	NCL	0.00465692	0.326381	6	0.120086	0.147293	5	1	UP
	UTY	0.0046678	0.326465	6	0.343964	0.162973	4	2	UP
	ZNF230	0.00471033	0.328758	6	0.146869	0.125244	4	2	UP
	DOCK5	0.004738	0.329648	6	0.114246	0.0493231	4	2	UP
	MED4	0.0047468	0.329648	6	0.128919	0.128653	5	1	UP
	SEC14L1	0.00475242	0.329648	6	0.138566	0.140862	3	3	UP
	CEP63	0.0047996	0.332237	6	0.0660687	0.0531991	3	3	UP
	YME1L1	0.00482099	0.333034	6	0.10669	0.134332	5	1	UP
	RAB9A	0.00483804	0.333356	6	0.105443	0.0911379	6	0	UP
	SESN1	0.00485829	0.333356	6	0.145724	0.122577	6	0	UP
	PPP2CA	0.00486207	0.333356	6	0.100427	0.10726	5	1	UP
	CSRP2BP	0.00487077	0.333356	5	0.353191	0.0543662	5	0	UP
	EIF3M	0.00488216	0.333356	6	0.126014	0.157397	5	1	UP
	SIGLECP3	0.00489114	0.333356	2	0.145003	0.145003	2	0	UP
	HBP1	0.00489487	0.333356	6	0.0567297	0.0468869	3	3	UP
	EIF4A2	0.0049298	0.335058	6	0.307598	0.0628757	5	1	UP
	TXNRD1	0.00494296	0.335276	6	0.0878964	0.0654187	4	2	UP
	TMCC1	0.00497952	0.337078	6	0.08445	0.140226	5	1	UP
	CLIP1	0.0050041	0.337885	6	0.10252	0.0872188	5	1	UP
	HMG20A	0.00502823	0.337885	6	0.0583566	0.0553675	6	0	UP
	PRKCH	0.00504006	0.337885	6	0.0379206	0.0831853	4	2	UP
	TMEM50B	0.00504156	0.337885	6	0.136925	0.103064	5	1	UP
	PHF20	0.00504668	0.337885	6	0.157475	0.153094	5	1	UP
	ARL1	0.00505159	0.337885	6	0.130362	0.0486139	6	0	UP
	SAR1A	0.00507425	0.338729	6	0.115655	0.0708101	6	0	UP
	RAB22A	0.00510137	0.339076	6	0.125153	0.135783	5	1	UP
	SRSF3	0.00510591	0.339076	4	0.266992	0.17263	4	0	UP
	RAP2A	0.00515131	0.339076	6	0.110596	0.0767295	4	2	UP
	PCGF3	0.00515782	0.339076	6	0.0923867	0.0840042	5	1	UP
	WNK1	0.00516489	0.339076	6	0.0372762	0.0175224	3	3	UP
	CNOT6	0.00517086	0.339076	6	0.0927955	0.0859148	5	1	UP
	LPCAT1	0.00519967	0.339076	6	0.0747647	0.0446643	6	0	UP
	JARID2	0.00520459	0.339076	6	0.0690573	0.0470983	4	2	UP
	CSPP1	0.0052211	0.339076	6	0.103536	0.0993153	5	1	UP
	AP3D1	0.00522369	0.339076	6	0.110779	0.0938438	6	0	UP
	CPSF6	0.00522982	0.339076	6	0.161198	0.0941438	4	2	UP
	ZNF443	0.00525619	0.339076	6	0.151197	0.0686863	5	1	UP
	WDR1	0.00525939	0.339076	6	0.133819	0.0628012	5	1	UP
	XRCC6	0.0052756	0.339076	6	0.165602	0.144588	5	1	UP
	LOC100130872	0.00528444	0.339076	6	0.202756	0.00671079	4	2	UP
	LRRC47	0.0053085	0.339076	6	0.0724787	0.0288786	6	0	UP
	ATRX	0.00531343	0.339076	6	0.122689	0.128304	4	2	UP
	C15orf40	0.0053194	0.339076	6	0.0935924	0.0637747	6	0	UP
	CTBP2	0.00532459	0.339076	6	0.130771	0.0336054	3	3	UP
	OTUD1	0.00533664	0.339076	6	0.0925624	0.0595706	5	1	UP
	RAB3GAP2	0.00533752	0.339076	6	0.0466716	0.057031	4	2	UP
	KLHL21	0.00533752	0.339076	6	0.0727643	0.0566086	5	1	UP
	PRPF38B	0.00533752	0.339076	6	0.159027	0.0776589	5	1	UP
	SNHG7	0.00533752	0.339076	5	0.00857674	0.041626	3	2	UP
	RPLP1	0.00534096	0.339076	6	0.0616386	0.0552053	5	1	UP
	SART3	0.00535144	0.339083	6	0.117409	0.112116	4	2	UP
	MAFG	0.00536259	0.339083	6	0.0729283	0.0512103	6	0	UP
	PDXK	0.00537286	0.339083	6	0.10757	0.0956121	6	0	UP
	BRF2	0.00539137	0.339083	6	0.0994645	0.0604869	6	0	UP
	ATR	0.00539137	0.339083	6	0.13962	0.101376	6	0	UP
	KIDINS220	0.00540534	0.339328	6	0.108128	0.0537448	4	2	UP
	IFT88	0.00542544	0.339957	6	0.0967034	0.0758201	6	0	UP
	PDE12	0.00544593	0.340524	6	0.0372743	0.0638436	5	1	UP
	SLC35D2	0.00545969	0.340524	6	0.0955347	0.0554398	6	0	UP
	SNX13	0.00547938	0.340524	6	0.114979	0.0499015	3	3	UP
	ACSL4	0.00548419	0.340524	6	0.142476	0.102017	5	1	UP
	BRPF3	0.00548499	0.340524	6	0.00996383	0.0630599	5	1	UP
	NDFIP1	0.00552557	0.340693	6	0.117154	0.0788564	6	0	UP
	SVIL	0.00553111	0.340693	6	0.137876	0.153493	5	1	UP
	RBM27	0.00553111	0.340693	6	0.0768317	0.050061	4	2	UP
	UBXN1	0.00553188	0.340693	6	0.0617461	0.0434614	6	0	UP
	ZAP70	0.00556351	0.340693	6	0.0917386	0.101612	6	0	UP
	DUSP22	0.00558269	0.340693	6	0.0845668	0.0787338	5	1	UP
	ERN1	0.00559164	0.340693	6	0.144611	0.0680889	5	1	UP
	CUL4A	0.00559211	0.340693	6	0.150697	0.107181	6	0	UP
	NUMA1	0.00559611	0.340693	6	0.115676	0.100198	5	1	UP
	RAD21	0.00560929	0.340693	6	0.105084	0.161116	4	2	UP
	SETX	0.00562163	0.340693	6	0.103813	0.15482	4	2	UP
	TGOLN2	0.00562239	0.340693	6	0.0867948	0.0908935	5	1	UP
	PRKCQ	0.00562304	0.340693	6	0.0907746	0.0976828	5	1	UP
	ARL6IP5	0.00564005	0.340693	6	0.101293	0.0720835	6	0	UP
	TRAPPC2	0.00564647	0.340693	6	0.0957619	0.100371	6	0	UP
	PJA2	0.00564942	0.340693	6	0.0929112	0.0971049	4	2	UP
	MKRN3	0.00568188	0.341598	6	0.0687103	0.058475	6	0	UP
	POLDIP3	0.0057123	0.341598	6	0.0346627	0.0965441	4	2	UP
	RSU1	0.00572722	0.341598	6	0.115633	0.0760141	5	1	UP
	ZNF706	0.00573371	0.341598	6	0.0743512	0.0616288	6	0	UP
	PRPF40A	0.00573425	0.341598	6	0.128724	0.12735	4	2	UP
	KIF13B	0.00574118	0.341598	6	0.0931983	0.117299	5	1	UP
	TAOK1	0.00574118	0.341598	6	0.0822693	0.151285	4	2	UP
	HFE	0.00574549	0.341598	6	0.00864333	0.0495433	5	1	UP
	TNK1	0.00578113	0.343112	5	0.0644666	0.0607956	4	1	UP
	POP5	0.00582206	0.34392	6	0.105439	0.0698112	6	0	UP
	CALM1	0.00582535	0.34392	6	0.110193	0.124471	5	1	UP
	MS4A2	0.00582536	0.34392	6	0.23546	0.132974	6	0	UP
	BRD1	0.0058396	0.343978	6	0.132675	0.0865389	6	0	UP
	LARP1	0.00584673	0.343978	6	0.0830732	0.0637009	4	2	UP
	SLC35E1	0.00586005	0.34416	6	0.0565932	0.0598712	3	3	UP
	CRBN	0.00588855	0.345233	6	0.0978456	0.0540757	4	2	UP
	ANXA7	0.00590206	0.345424	6	0.0915697	0.110485	4	2	UP
	UHMK1	0.0059495	0.347515	6	0.172287	0.209667	5	1	UP
	C15orf54	0.0059584	0.347515	6	0.109042	0.049169	6	0	UP
	DIS3L2	0.00598359	0.348214	6	0.213096	0.0667176	4	2	UP
	TSHZ2	0.00599725	0.348214	6	0.066052	0.0670058	4	2	UP
	AKAP7	0.00600138	0.348214	6	0.113659	0.136655	5	1	UP
	TFEC	0.0060198	0.348683	6	0.164215	0.125859	4	2	UP
	SIAH1	0.00603834	0.349157	6	0.110036	0.0661678	4	2	UP
	FGFR1	0.00605633	0.349422	6	0.0977448	0.0925929	4	2	UP
	HSD17B12	0.00606365	0.349422	6	0.0981381	0.106073	5	1	UP
	STAMBPL1	0.00607747	0.349621	6	0.079006	0.0685794	5	1	UP
	CHPF2	0.00609341	0.349941	6	0.0808584	0.0682127	4	2	UP
	DHRS3	0.00612482	0.350728	6	0.114111	0.0841034	6	0	UP
	ZNF365	0.00613023	0.350728	6	0.051197	0.0470795	5	1	UP
	MTMR2	0.00614467	0.350728	6	0.147981	0.0983893	5	1	UP
	MLLT6	0.0061495	0.350728	6	0.116714	0.0767852	5	1	UP
	KLRB1	0.00615915	0.350728	6	0.283634	0.310002	6	0	UP
	ZNF699	0.00617663	0.351131	3	0.129781	0.10346	3	0	UP
	KIAA0232	0.00620453	0.352123	6	0.116617	0.117473	5	1	UP
	RAD23B	0.00623252	0.352601	6	0.160509	0.0822249	4	2	UP
	TSHZ1	0.00623387	0.352601	6	0.131466	0.125845	5	1	UP
	CLPX	0.00625304	0.353092	6	0.138068	0.0932818	6	0	UP
	RSF1	0.00629063	0.354621	6	0.15765	0.143692	5	1	UP
	PURB	0.0063327	0.356167	6	0.0186367	0.0305765	4	2	UP
	SPTY2D1	0.00633918	0.356167	6	0.101968	0.127891	4	2	UP
	NDRG3	0.00637655	0.356444	6	0.147992	0.107164	4	2	UP
	IL2RB	0.00640455	0.356444	6	0.180293	0.133491	4	2	UP
	C9orf3	0.00640455	0.356444	6	0.00818413	0.0212356	3	3	UP
	ZYX	0.00640455	0.356444	6	0.0805407	0.100524	4	2	UP
	ZNF609	0.00640455	0.356444	6	0.0910593	0.0913811	5	1	UP
	B4GALT4	0.00640755	0.356444	6	0.102225	0.105071	4	2	UP
	FBXO11	0.00643811	0.357126	6	0.0932007	0.0612821	4	2	UP
	WRNIP1	0.00644499	0.357126	6	0.0490475	0.062711	4	2	UP
	HDAC2	0.00647437	0.357126	6	0.118266	0.0872473	5	1	UP
	REV1	0.00648803	0.357126	6	0.0678356	0.0106983	3	3	UP
	ENOSF1	0.00648945	0.357126	6	0.123739	0.137629	5	1	UP
	METAP1	0.00649952	0.357126	6	0.103041	0.0834905	5	1	UP
	TTC38	0.00649955	0.357126	6	0.199781	0.15063	5	1	UP
	PDLIM3	0.00650456	0.357126	6	0.0657938	0.0448822	5	1	UP
	SUPT7L	0.00652342	0.357428	6	0.0706622	0.0427722	6	0	UP
	MATR3	0.00653127	0.357428	6	0.165329	0.195589	5	1	UP
	TRPS1	0.00656019	0.358339	6	0.0810689	0.0822433	5	1	UP
	DEDD	0.00656917	0.358339	6	0.122668	0.0802545	4	2	UP
	ARNTL	0.0065856	0.358654	6	0.100566	0.135304	5	1	UP
	PAN3	0.00659805	0.358753	6	0.0922087	0.063796	5	1	UP
	ILKAP	0.00661081	0.358868	6	0.071885	0.0435357	6	0	UP
	IFNGR1	0.00664279	0.360024	6	0.110929	0.0942924	3	3	UP
	SNRPD3	0.00667698	0.361296	6	0.124436	0.0719297	6	0	UP
	CLEC2B	0.00671005	0.362504	6	0.309984	0.190166	6	0	UP
	MIOS	0.00674956	0.363474	6	0.0789698	0.064074	4	2	UP
	GOPC	0.0067813	0.3646	6	0.145358	0.149089	5	1	UP
	ATM	0.00680209	0.365136	6	0.132263	0.132484	5	1	UP
	PHF20L1	0.0068371	0.365471	6	0.0857853	0.101256	4	2	UP
	PSMD4	0.00683911	0.365471	6	0.00436659	0.0237802	3	3	UP
	COX7A2L	0.0068451	0.365471	6	0.0915751	0.0855289	5	1	UP
	PNRC2	0.00685399	0.365471	6	0.0650626	0.0148264	3	3	UP
	LAMP2	0.00688383	0.365471	6	0.0685519	0.140558	4	2	UP
	TAF15	0.00689323	0.365471	6	0.199487	0.227647	5	1	UP
	ARMC5	0.00691434	0.365471	6	0.0587376	0.0432934	5	1	UP
	G3BP2	0.00692545	0.365471	6	0.0913803	0.131549	4	2	UP
	CCDC82	0.00692875	0.365471	6	0.133195	0.0832084	5	1	UP
	DHX40	0.00694161	0.365471	6	0.0856564	0.0824284	4	2	UP
	NR1D2	0.0069497	0.365471	6	0.072158	0.128001	4	2	UP
	LOC101060747	0.00696011	0.365471	3	0.249421	0.172796	3	0	UP
	NIPBL	0.00696011	0.365471	6	0.117993	0.123797	4	2	UP
	ABAT	0.00696011	0.365471	6	0.0815467	0.085163	5	1	UP
	EIF4G2	0.00699206	0.366578	6	0.0563089	0.0564105	5	1	UP
	PARK7	0.00702412	0.367687	6	0.107386	0.115151	5	1	UP
	POLR1E	0.00704703	0.368314	6	0.0924348	0.103023	6	0	UP
	MRPL30	0.00707781	0.36935	6	0.0681098	0.0852022	5	1	UP
	MED17	0.00709832	0.369848	6	0.1462	0.135225	5	1	UP
	TRNAU1AP	0.00712111	0.370463	6	0.0759099	0.0790019	5	1	UP
	FBXW7	0.00716237	0.372035	6	0.0542722	0.0728621	4	2	UP
	PCMTD1	0.00723301	0.372933	6	0.111798	0.0622368	4	2	UP
	PAFAH1B1	0.00724845	0.372933	6	0.112146	0.11452	5	1	UP
	TMEM184C	0.00727001	0.372933	6	0.0433312	0.0339673	6	0	UP
	AKT3	0.00727376	0.372933	6	0.063911	0.0634672	5	1	UP
	NACA	0.00727883	0.372933	6	0.12325	0.0825294	5	1	UP
	SAP18	0.00728466	0.372933	6	0.109732	0.127242	4	2	UP
	SMAD4	0.00728985	0.372933	6	0.12191	0.0965242	6	0	UP
	ZNF326	0.00729028	0.372933	6	0.122896	0.0537388	5	1	UP
	SLC36A4	0.00732341	0.37406	6	0.123587	0.123392	5	1	UP
	ZDHHC17	0.00737871	0.375364	6	0.18411	0.127415	5	1	UP
	MRI1	0.00737871	0.375364	6	0.0342176	0.025142	3	3	UP
	EWSR1	0.00738832	0.375364	6	0.11902	0.136589	5	1	UP
	THUMPD1	0.00740396	0.375364	6	0.131994	0.0967315	5	1	UP
	MAPK8IP3	0.00742908	0.375364	6	0.144471	0.0903808	5	1	UP
	RNF114	0.00743468	0.375364	6	0.0526205	0.0522872	5	1	UP
	OSBPL2	0.00743907	0.375364	6	0.12858	0.172622	5	1	UP
	PGM1	0.00747143	0.375364	6	0.102833	0.0168417	4	2	UP
	SNORD3D///SNORD3C///SNORD3B-2///SNORD3A///SNORD3B-1	0.00747143	0.375364	1	1.06183	1.06183	1	0	UP
	EVPLL	0.00747143	0.375364	3	0.0192195	-0.0476723	1	2	UP
	EDG4	0.00747143	0.375364	2	0.191494	0.191494	2	0	UP
	IL6ST	0.00749874	0.375933	6	0.120425	0.116716	4	2	UP
	PICALM	0.00752089	0.375933	6	0.118499	0.113846	4	2	UP
	IRS2	0.00752089	0.375933	6	0.158861	0.117412	4	2	UP
	TRO	0.00752736	0.375933	6	0.0882466	0.0440104	6	0	UP
	PLIN5	0.00756162	0.376875	5	0.142186	0.0592202	4	1	UP
	DDX42	0.00756858	0.376875	6	0.0595024	0.0389019	4	2	UP
	GAS2L2	0.00760406	0.377154	6	0.0377316	0.0469814	5	1	UP
	ATP2A2	0.00760976	0.377154	6	0.107593	0.0657848	5	1	UP
	NAP1L1	0.00761049	0.377154	6	0.15367	0.120586	5	1	UP
	ITGAM	0.00764401	0.377154	6	0.196983	0.118797	6	0	UP
	SMARCC1	0.00764401	0.377154	6	0.0919415	0.0529009	5	1	UP
	POLG	0.00765057	0.377154	6	0.117663	0.11559	6	0	UP
	CD99L2	0.00765724	0.377154	6	0.0574685	0.0673859	4	2	UP
	NUDT16	0.00767986	0.377154	6	0.121844	0.0932534	5	1	UP
	COCH	0.00768413	0.377154	6	0.0551749	0.0835406	5	1	UP
	NAPB	0.00768787	0.377154	6	0.0787147	0.0595618	6	0	UP
	BCLAF1	0.00770534	0.377154	6	0.1145	0.0572621	4	2	UP
	HNRNPH3	0.00771252	0.377154	6	0.160045	0.0778612	5	1	UP
	CYLD	0.00772344	0.377154	6	0.0697826	0.0899065	4	2	UP
	KCNT1	0.00773218	0.377154	6	0.0673841	0.0657539	4	2	UP
	GOLIM4	0.007742	0.377154	6	0.1385	0.0531748	6	0	UP
	DSCR3	0.00776079	0.377291	6	0.0526039	0.0837832	5	1	UP
	PGM2	0.00776721	0.377291	6	0.0706965	0.103502	5	1	UP
	ID2	0.00780212	0.378442	6	0.163888	0.1517	4	2	UP
	CALCOCO1	0.00781833	0.378644	6	0.0674832	0.0665272	4	2	UP
	ST3GAL4	0.00782875	0.378644	6	0.116822	0.129314	5	1	UP
	SYNCRIP	0.0079065	0.38134	6	0.075717	0.109295	4	2	UP
	HERC1	0.00790846	0.38134	6	0.116693	0.109333	4	2	UP
	TBL1X	0.00792625	0.38134	6	0.100428	0.152172	4	2	UP
	ITFG2	0.00795188	0.38134	6	0.0217506	0.05455	5	1	UP
	UBE2W	0.00795536	0.38134	6	0.0910375	-0.0294209	3	3	UP
	TAF1	0.00795536	0.38134	6	0.117582	0.0317805	4	2	UP
	ANP32B	0.00796368	0.38134	6	0.0616029	0.0735931	5	1	UP
	GPR37L1	0.00801562	0.382827	6	0.177926	0.0832082	4	2	UP
	ZNF529	0.00801745	0.382827	6	0.122151	0.0885837	6	0	UP
	ZNF17	0.0080467	0.383681	6	0.116724	0.0500603	5	1	UP
	TUBGCP5	0.00807783	0.384353	6	0.10998	0.0447476	6	0	UP
	GNS	0.00809716	0.384353	6	0.123431	0.126868	4	2	UP
	MFSD1	0.00810282	0.384353	6	0.137698	0.0405372	5	1	UP
	MOAP1	0.00810641	0.384353	6	0.121596	0.136228	5	1	UP
	CXorf65	0.00813424	0.385131	6	0.0637983	0.0471842	6	0	UP
	MAGI1	0.00820186	0.386862	6	0.0417576	-0.0245836	2	4	UP
	CYP1B1	0.00822081	0.386862	6	0.153251	0.149804	5	1	UP
	TAGLN	0.00822687	0.386862	6	0.0728072	0.107293	5	1	UP
	YAF2	0.00823293	0.386862	6	0.128118	0.0854928	5	1	UP
	MLC1	0.00824225	0.386862	6	0.0909508	0.0671285	5	1	UP
	ODF3	0.00824505	0.386862	6	0.0952321	0.0484811	5	1	UP
	TRAPPC9	0.00825112	0.386862	6	0.0661762	0.0815774	5	1	UP
	PPP2R5A	0.00826413	0.386882	6	0.114033	0.093987	5	1	UP
	TRIM59	0.0082745	0.386882	6	0.113692	0.058515	6	0	UP
	UBR3	0.00831574	0.388271	6	0.100004	0.0698011	5	1	UP
	SLC7A6	0.00834259	0.388721	6	0.0894146	0.100688	5	1	UP
	KIF2A	0.00834844	0.388721	6	0.121935	0.0467996	4	2	UP
	MAP4	0.00836712	0.389054	6	0.0786394	0.0601621	5	1	UP
	MTMR3	0.00838232	0.389224	6	0.0548794	0.14983	4	2	UP
	SLC38A2	0.0084017	0.389587	6	0.0974825	0.0405868	4	2	UP
	DHX9	0.00841757	0.389787	6	0.102658	0.104417	5	1	UP
	PRDM2	0.0084455	0.389905	6	0.0661313	0.0675262	4	2	UP
	GLG1	0.00845482	0.389905	6	0.0919926	0.110533	5	1	UP
	OTUD4	0.00845482	0.389905	6	0.0899513	0.0633656	5	1	UP
	DOCK8	0.0085025	0.390012	6	0.133874	0.0354889	5	1	UP
	PMS2	0.00851092	0.390012	6	0.0788559	0.0811386	4	2	UP
	SDHC	0.00853814	0.390012	6	0.0291051	-0.00866092	3	3	UP
	CFC1B	0.00853814	0.390012	5	0.0357278	0.0258452	3	2	UP
	SETD1B	0.00853814	0.390012	6	0.0762349	0.0227478	4	2	UP
	ST8SIA4	0.00853814	0.390012	6	0.0921692	0.140276	4	2	UP
	SCARNA9	0.00853814	0.390012	3	0.23789	0.0329443	2	1	UP
	ZNF45	0.00855911	0.390441	6	0.130598	0.128806	5	1	UP
	API5	0.00860388	0.391667	6	0.102717	0.099151	4	2	UP
	ZNF611	0.00860921	0.391667	6	0.119259	0.113948	5	1	UP
	HSD11B1L	0.00865479	0.39268	6	0.00657692	0.0518439	4	2	UP
	HAUS6	0.00865479	0.39268	6	0.110714	-0.0502182	2	4	UP
	ACP1	0.00869111	0.392855	6	0.0542372	0.0926109	5	1	UP
	PTPRA	0.00869121	0.392855	5	0.128099	0.0662309	4	1	UP
	ZNF546	0.0086936	0.392855	6	0.0926625	0.0711365	6	0	UP
	NARS	0.00874432	0.394618	6	0.12207	0.104803	6	0	UP
	PEX11A	0.00876725	0.395124	6	0.115403	0.0481388	5	1	UP
	RPP14	0.00879913	0.395771	6	0.0976111	0.112583	5	1	UP
	AVL9	0.00880508	0.395771	6	0.0909391	0.0888214	4	2	UP
	PIGT	0.00883393	0.396459	6	0.0379617	0.0859107	4	2	UP
	XPNPEP1	0.00884391	0.396459	6	0.11602	0.0683956	5	1	UP
	KLRF1	0.00886519	0.396885	6	0.375708	0.298099	6	0	UP
	ADO	0.00889531	0.397705	6	0.0817895	0.0789196	5	1	UP
	TIA1	0.00894047	0.399195	6	0.133045	0.141605	5	1	UP
	C16orf62	0.00898897	0.400322	6	0.112224	0.0951022	5	1	UP
	ABHD6	0.00900732	0.400322	5	0.00835592	0.0883255	4	1	UP
	EEF1D	0.00900849	0.400322	6	0.146705	0.135364	5	1	UP
	TLR2	0.00901524	0.400322	6	0.128472	0.133574	5	1	UP
	HECA	0.00902509	0.400322	6	0.0947954	0.0724374	4	2	UP
	SERHL	0.00906071	0.401374	5	0.047379	0.0575757	4	1	UP
	LARS	0.00910654	0.402543	6	0.122185	0.153885	4	2	UP
	ADRB2	0.00911589	0.402543	6	0.146326	0.115603	6	0	UP
	MRS2	0.00912292	0.402543	6	0.18527	0.106735	5	1	UP
	ARHGDIB	0.0091624	0.403756	6	0.0613857	0.0389475	5	1	UP
	ANP32A	0.00917563	0.403812	6	0.0240978	0.150222	4	2	UP
	PTK2	0.00920862	0.404035	6	0.0904551	0.0680515	5	1	UP
	HAVCR2	0.00923516	0.404035	6	0.0389431	0.117378	4	2	UP
	ZC3H4	0.00924015	0.404035	6	0.112526	0.0752536	4	2	UP
	GOLGA2	0.00924174	0.404035	6	0.0657489	0.0628454	5	1	UP
	OSBPL8	0.00925822	0.404035	6	0.0205388	0.12424	4	2	UP
	AKAP13	0.00927631	0.404035	6	0.139145	0.0983272	4	2	UP
	DSTYK	0.00928497	0.404035	6	0.248962	0.0955613	5	1	UP
	ARPC5	0.00928828	0.404035	6	0.134432	0.0671782	5	1	UP
	ILF3	0.00929494	0.404035	6	0.115661	0.101228	5	1	UP
	RNF141	0.00931256	0.404035	6	0.131877	0.112478	4	2	UP
	ACTR2	0.00932989	0.404035	6	0.0941328	0.0630832	4	2	UP
	RPS17	0.00934501	0.404035	6	0.148973	0.0752816	5	1	UP
	ACADVL	0.00935507	0.404035	6	0.0572121	0.0815356	5	1	UP
	CPVL	0.00936711	0.404035	6	0.160652	0.20281	4	2	UP
	TOR1AIP1	0.00936711	0.404035	6	0.0628906	0.087915	5	1	UP
	GLS	0.00937246	0.404035	6	0.154361	0.0891989	6	0	UP
	NRP2	0.00940359	0.404349	6	0.226185	0.0611493	4	2	UP
	TBC1D4	0.00940533	0.404349	6	0.0883968	0.11926	4	2	UP
	CRISPLD2	0.00943571	0.404349	6	0.150275	0.0988318	6	0	UP
	INTS3	0.00944246	0.404349	6	0.0931557	0.0562375	5	1	UP
	LRRC57	0.00944921	0.404349	6	0.193532	0.0772552	5	1	UP
	RPL13	0.00948919	0.404349	6	0.0534609	-0.0143977	3	3	UP
	CCNL2	0.00951357	0.404349	6	0.0964837	0.0934195	4	2	UP
	ZNF234	0.0095253	0.404349	6	0.0752414	0.0583319	6	0	UP
	SPEN	0.00953728	0.404349	6	0.0912583	0.0931984	5	1	UP
	C7orf25	0.00956451	0.404349	6	0.133011	0.0929603	5	1	UP
	ZNF792	0.00957006	0.404349	6	0.0614633	0.0650277	6	0	UP
	C12orf49	0.00959611	0.404349	6	0.0387913	0.0730369	4	2	UP
	NDST2	0.00960469	0.404349	6	0.0799746	0.0653468	5	1	UP
	SLC34A1	0.00960469	0.404349	6	0.0384116	0.044224	3	3	UP
	ADNP2	0.00960469	0.404349	6	0.0917355	0.119003	5	1	UP
	STK40	0.00960469	0.404349	6	0.079905	0.111922	4	2	UP
	SACM1L	0.00960469	0.404349	6	0.16202	0.123178	6	0	UP
	RPS8	0.00960585	0.404349	6	0.212378	0.119089	5	1	UP
	RGS2	0.00962437	0.404349	6	0.158166	0.146149	4	2	UP
	FAM13B	0.00962437	0.404349	6	0.0571118	0.0448304	4	2	UP
	NDUFV3	0.00964979	0.404349	6	0.0274665	0.0288345	4	2	UP
	CTNNA1	0.00965969	0.404349	6	0.153556	0.132442	4	2	UP
	MLYCD	0.00967403	0.404349	6	0.0866356	0.0856754	5	1	UP
	RNF168	0.00968779	0.404349	6	0.11682	0.101163	6	0	UP
	KRT20	0.00970084	0.404349	6	0.118345	0.0642207	4	2	UP
	NUDCD2	0.00970157	0.404349	6	0.0748006	0.0895248	5	1	UP
	NRD1	0.00970361	0.404349	5	0.0880719	0.0381424	3	2	UP
	EXTL3	0.00975246	0.405883	6	0.105772	0.11176	4	2	UP
	PTPRC	0.0097734	0.406253	6	0.0752225	0.0444942	3	3	UP
	LYRM7	0.00981927	0.406844	6	0.105572	0.139005	5	1	UP
	VPS13C	0.00982507	0.406844	6	0.0702051	0.0841552	5	1	UP
	ERICH1	0.00982966	0.406844	6	0.0980476	0.0985739	4	2	UP
	STK10	0.0098563	0.406844	6	0.10331	0.100477	5	1	UP
	PRPSAP1	0.00986673	0.406844	6	0.178984	0.088984	5	1	UP
	MEF2D	0.00989806	0.406844	6	0.0857894	0.114014	4	2	UP
	TM2D1	0.00990302	0.406844	6	0.102364	0.098614	5	1	UP
	TAOK2	0.00990852	0.406844	6	0.00726046	0.0566727	4	2	UP
	MYCN	0.00990852	0.406844	6	0.133093	0.0814978	4	2	UP
	NUP43	0.00991003	0.406844	6	0.114738	0.0933666	5	1	UP
	RAB24	0.00992036	0.406844	6	0.0537845	0.0467855	3	3	UP
	R3HDM2	0.00994281	0.407087	6	0.0820105	0.0635423	5	1	UP
	LPAR1	0.00995044	0.407087	6	0.0966156	0.103322	5	1	UP
	JMJD1C	0.00998071	0.40783	6	0.118283	0.112589	4	2	UP

## Sheet: Table S3
	Table S3. Hub genes identified from the protein–protein interaction network using CytoHubba based on Maximal Clique Centrality (MCC) scores.
	Gene	Direction	Module	mean_logFC	RRA_pval	MCC_score	Degree
	DDX6	Up	Global	0.0820559	0.000900203	28	13
	DHX9	Up	Global; Cluster2	0.102658	0.00841757	766	32
	EIF1	Up	Global; Cluster1	0.0750589	0.00161447	1444	13
	EIF2S3	Up	Global; Cluster1	0.128541	0.00111581	1442	13
	EIF3A	Up	Global; Cluster1	0.17988	0.000581838	1440	11
	EIF3D	Up	Global; Cluster1	0.105697	0.00229106	1440	10
	EIF3L	Up	Global; Cluster1	0.107351	0.00137469	1440	9
	EIF3M	Up	Global; Cluster1	0.126014	0.00488216	720	10
	EIF4E	Up	Global	0.1509	0.000525795	43	22
	HNRNPA1	Up	Global; Cluster2	0.150254	0.00392779	744	32
	HNRNPA2B1	Up	Global; Cluster2	0.18427	0.000949955	738	26
	HNRNPR	Up	Global; Cluster2	0.161459	0.00109509	726	17
	HNRNPU	Up	Global; Cluster2	0.163524	0.00056706	728	20
	ILF3	Up	Global; Cluster2	0.115661	0.00929494	720	15
	PIK3R1	Up	Global	0.125134	0.00256582	29	26
	RPL13	Up	Global	0.0534609	0.00948919	30	12
	RPS17	Up	Global; Cluster1	0.148973	0.00934501	745	15
	RPS8	Up	Global; Cluster1	0.212378	0.00960585	1472	19
	SYNCRIP	Up	Global; Cluster2	0.075717	0.0079065	730	16
	UBA52	Up	Global	0.0375755	0.00462829	34	29

## Sheet: Table S4
		Table S4. Key lncRNA–mRNA regulatory pairs identified based on reproducible correlation analysis across multiple ASD datasets.
		lncRNA	mRNA	n_dataset	mean_cor	min_p
		MALAT1	HNRNPA2B1	4	0.500415	4.40821e-15
		MALAT1	HNRNPR	3	0.635761	2.36144e-18
		MALAT1	EIF4E	3	0.56974	1.05641e-13
		MALAT1	EIF3A	3	0.529016	3.21258e-15
		MALAT1	DHX9	3	0.525898	3.05528e-14
		MALAT1	HNRNPU	3	0.520377	6.0526e-17
		MALAT1	SYNCRIP	3	0.490559	4.88612e-13
		MALAT1	EIF3M	3	0.467437	3.34261e-21
		MALAT1	PIK3R1	3	0.464042	2.82309e-09
		MALAT1	HNRNPA1	3	0.441217	1.18349e-14
		DSCR8	HNRNPR	3	-0.377661	7.22727e-06
		DSCR8	DHX9	3	-0.34942	5.26656e-07
		DSCR8	EIF2S3	3	-0.30741	2.63638e-05
		MALAT1	EIF1	3	-0.0615397	7.17112e-07
		MALAT1	EIF2S3	2	0.592603	7.43383e-24
		MALAT1	RPS17	2	0.575705	4.98243e-10
		MALAT1	DDX6	2	0.573143	5.5427e-15
		AQP4-AS1	EIF3L	2	-0.521386	2.7524e-16
		DSCR8	EIF3L	2	-0.489775	2.31887e-09
		AQP4-AS1	EIF3A	2	-0.488067	7.09319e-12
		MALAT1	EIF3D	2	0.464802	1.53754e-08
		SNHG7	EIF3D	2	0.45674	5.2263e-08
		AQP4-AS1	HNRNPR	2	-0.456	1.4493e-10
		DSCR8	ILF3	2	-0.449586	2.25561e-10
		AQP4-AS1	SYNCRIP	2	-0.426648	5.43412e-08
		MALAT1	ILF3	2	0.415805	7.73727e-10
		SNHG7	UBA52	2	0.412262	1.57857e-07
		AQP4-AS1	EIF3M	2	-0.395585	3.41537e-06
		AQP4-AS1	PIK3R1	2	-0.390422	2.6744e-08
		DSCR8	EIF3A	2	-0.383748	1.57057e-06
		SNHG7	EIF3L	2	0.374661	9.46843e-06
		DSCR8	PIK3R1	2	-0.371584	7.00257e-05
		NAPA-AS1	HNRNPU	2	-0.371378	1.45616e-05
		DSCR8	EIF3M	2	-0.370445	4.94173e-05
		DSCR8	SYNCRIP	2	-0.36355	4.71234e-06
		AQP4-AS1	HNRNPA2B1	2	-0.359752	5.12153e-06
		DSCR8	DDX6	2	-0.344965	7.43646e-07
		AQP4-AS1	EIF4E	2	-0.337351	5.42499e-06
